# Supplementary material for: NPClassifier: A Deep Neural Network-Based Structural Classification Tool for Natural Products
Source: PubMed Central journal article supplement — J Nat Prod. 2021 Oct 18;84(11):2795–807. doi: 10.1021/acs.jnatprod.1c00399 (PMC8631337; doi:10.1021/acs.jnatprod.1c00399), 2021-10-18
Supplement: np1c00399_si_003.pdf [file np1c00399_si_003.pdf]

## Supporting information

# **NPClassifier: A deep neural network-based structural classification tool for natural products**

Hyun Woo Kim<sup>1</sup>, Mingxun Wang<sup>2,3</sup>, Christopher A. Leber<sup>1</sup>, Louis-Félix Nothias<sup>2</sup>, Raphael Reher<sup>1</sup>, Kyo Bin Kang<sup>4</sup>, Justin J. J. van der Hooff<sup>5</sup>, Pieter C. Dorrestein<sup>2</sup>, William H. Gerwick,<sup>1,2\*</sup> and Garrison W. Cottrell<sup>6\*</sup>

### **Affiliation**

<sup>1</sup>Center for Marine Biotechnology and Biomedicine, Scripps Institution of Oceanography, UC San Diego La Jolla, CA, USA.

<sup>2</sup>Skaggs School of Pharmacy and Pharmaceutical Sciences, University of California, San Diego, La Jolla, CA, USA.

<sup>3</sup>Ometa Labs LLC, San Diego, CA, USA.

<sup>4</sup>Research Institute of Pharmaceutical Sciences, College of Pharmacy, Sookmyung Women's University, Seoul 04310, Korea

<sup>5</sup>Bioinformatics Group, Wageningen University, Wageningen, NL, the Netherlands.

<sup>6</sup>Department of Computer Science and Engineering, University of California, San Diego, La Jolla, CA, USA.

## Table of contents

1. Introduction of NPClassifier website and API
2. Experimental Methods
3. Classification schema and evaluation of NPClassifier
4. References

## List of Figures

**Figure S1** Webpage of NPClassifier.

**Figure S2** A result from application programming interface (API) for NPClassifier.

**Figure S3** Overview of the NPClassifier dataset. (A) The public database source for the dataset: Pubchem (n=39,549), LIPID MAPS (n=23,506), UNPD (n=5,337), ChEBI (n=3,219), Chempid (n=1,453), and manual curation (n=534). (B) Pathways and Superclasses in the data set.

**Figure S4** The distribution of molecular weights and structure diversity in the NPClassifier dataset. (A) The overlapped histogram of molecular weights from the NPClassifier dataset and UNPD database. (B) The distribution of molecular weights from each Pathway of the data set. Note that the y-axes are different in each case. (C) Mapping chemical space of UNPD database and NPClassifier dataset with UMAP. Molecular structures in the analysis were represented by 2048-bit Morgan fingerprints.

**Figure S5** (-)-Dunniane (left) and its artificially modified methyl ester structure (right) as an illustration of data augmentation.

**Figure S6** An example of a molecule possessing multi-components. The halfordinol contains oxazole and pyridine moieties that derive from tyrosine and nicotinic acid, respectively.

**Figure S7** Effect of dropout regularization in the training of NPClassifier.

## List of Tables

**Table 1.** Hyperparameters for training the deep neural networks for NPClassifier

# 1. Introduction of NPClassifier website and API

## 1.1. Website

NPClassifier webpage (<https://npclassifier.ucsd.edu>) was designed to provide easy-to-use classification for a single queried molecule.

The screenshot shows the NP Classifier web interface. At the top, it says "NP Classifier" and "Version - Release\_1". Below that is a text input field containing the SMILES string: CC1C(O)CC2C1C(OC1OC(COC(C)=O)C(O)C(O)C1O)OC=C2C(O)=O. Below the input field, the text "Input (SMILES only)" is written in red. Underneath is a chemical structure diagram of the molecule. Below the structure, the text "Molecular structure" is written in red. At the bottom, there is a table with the word "Results" written in red to its left. The table has columns for "entry" and "type". The results are as follows:

| entry                   | type       |
|-------------------------|------------|
| Iridoids monoterpenoids | class      |
| Monoterpenoids          | superclass |
| Terpenoids              | pathway    |
| glycoside               | glycoside  |

Figure S1 Webpage of NPClassifier

**Input:** Paste the SMILES into the blank. Only isomeric or canonical SMILES strings are supported as input format.

**Molecular structure:** The structure of a queried molecule. It will be shown when the SMILES is submitted.

**Results:** Three hierarchical classes (Pathway, Superclass, and Class) and glycoside information are provided. The glycoside results are shown when the queried molecule contains sugar moiety. If the queried molecule isn't classified (probability is under threshold, 0.5), the results section remains empty.

**\*Note:** If the queried SMILES is invalid, the molecular structure may not be shown. Then please visit <https://cactus.nci.nih.gov/translate/>, get a unique SMILES, and try again with NPClassifier.

### 1.2. Application programming interface (API) for NPClassifier

The API for NPClassifier was built for classifying massive data easily by scripts.

**Link:** <https://npclassifier.ucsd.edu/classify?smiles=<SMILES>>

**Output:** dictionary

**Key list:**

“**class\_results**”: Class results

“**superclass\_results**”: Superclass results

“**pathway\_results**”: Pathway results

“**isglycoside**”: Whether the queried molecule is a glycoside or not (true/false)

“**fp1**”: Counted Morgan fingerprints

### 1.3. An example of using API (Isoravenelone)

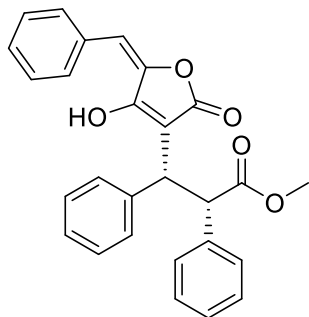

**SMILES:**

COC(=O)[C@H](C1=CC=CC=C1)[C@H](C2=CC=CC=C2)C3=C(/C(=C\C4=CC=CC=C4)/OC3=O)O

**Link:**

[https://npclassifier.ucsd.edu/classify?smiles=COC\(\[C@@H\]\)\(\[C@@H\]\(C1=C\(O\)/C\(OC1=O\)=C\C2=CC=CC=C2\)C3=CC=CC=C3\)C4=CC=CC=C4\)=O](https://npclassifier.ucsd.edu/classify?smiles=COC([C@@H])([C@@H](C1=C(O)/C(OC1=O)=C\C2=CC=CC=C2)C3=CC=CC=C3)C4=CC=CC=C4)=O)





The distribution of the molecular weights from the dataset is shown in Figure S4. Over all classes, the molecular weights were mostly distributed in the range 100 to 2000, which is similar to those in the Dictionary of Natural Products and UNPD, two representative natural product databases.<sup>51, 53</sup> The minimum molecular weight was 58 Da for pentane, a representative of the hydrocarbon Class. The maximum molecular weight NP was 5031 Da for polytheonamide A, a ribosomally synthesized and post-translationally modified peptides (RiPPs). This dataset was split in a stratified fashion using the Class labels; 64% were assigned to the training set, 16% to validation set, and 20% to the test set.

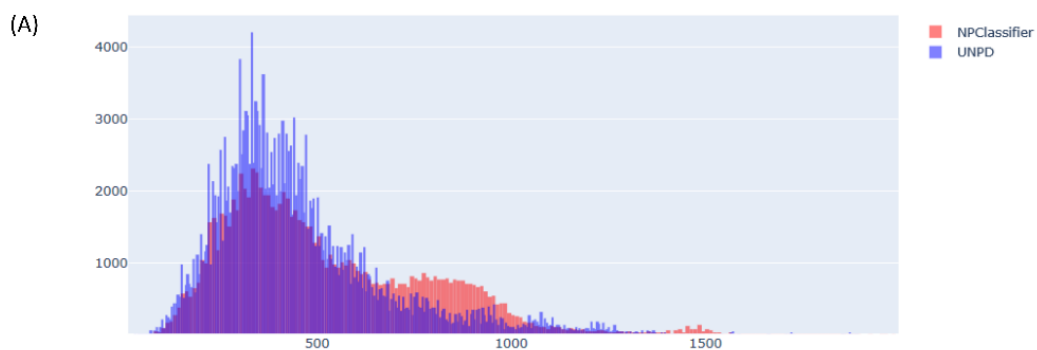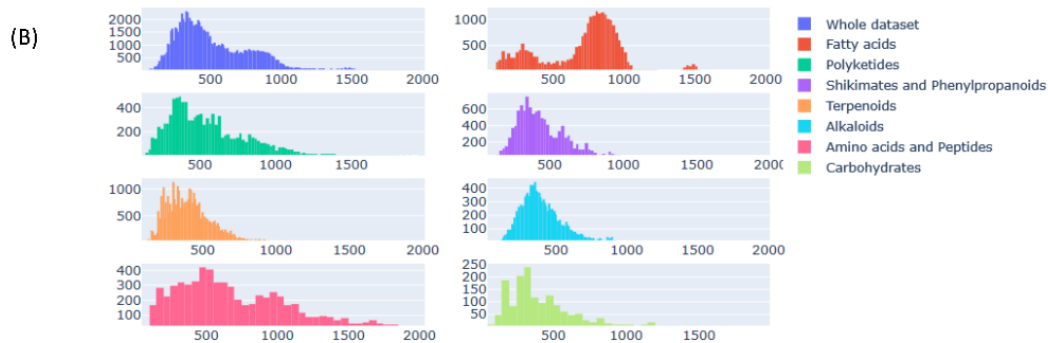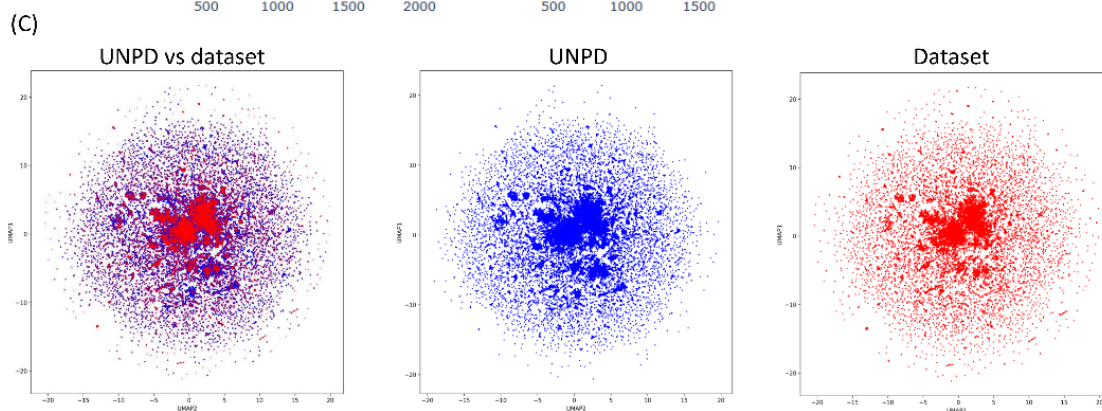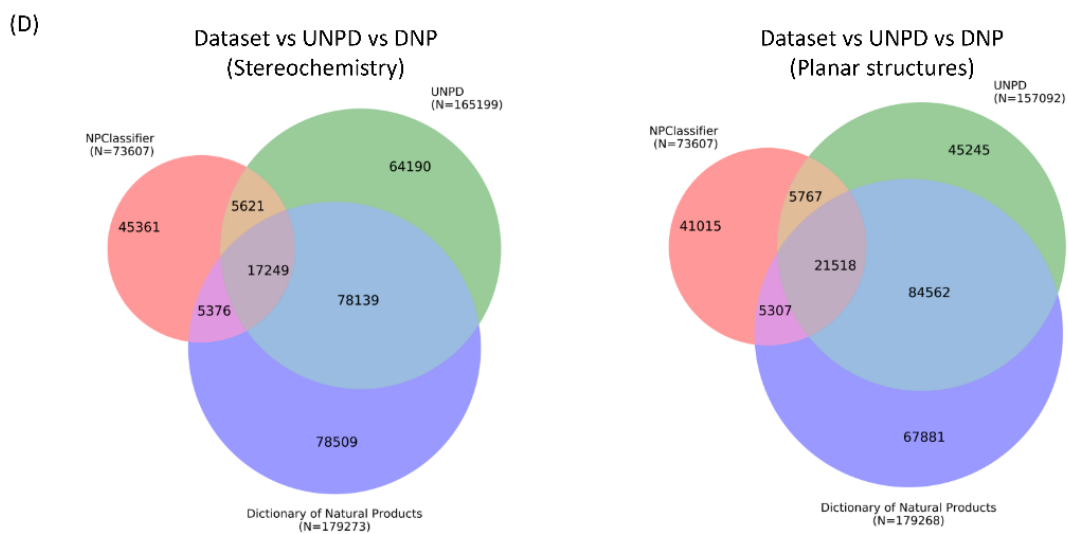



**Figure S4** The distribution of molecular weights in the NPClassifier dataset. (A) The overlapped histogram of molecular weights from the NPClassifier dataset and UNPD database. (B) The distribution of molecular weights from each Pathway of the data set. Note that the y-axes are different in each case. (C) Mapping chemical spaces of UNPD database (Blue) and NPClassifier dataset (Red) with UMAP. Molecular structures in the analysis were represented by 2048-bit Morgan fingerprints. (D) Venn diagrams of the chemical entities from NPClassifier dataset, UNPD database, and Dictionary of Natural Products with/without stereochemistry.

**Data augmentation.** The number of NP examples in the training set for each of the Classes was unbalanced because some of the reported scaffolds are quite rare. For example, there are only two examples of dunniane-type sesquiterpenoids, (-)-dunniane and (-)-cumacrene. Because there were several other poorly populated classes of NPs in the dataset, we artificially built biosynthetically possible structures based on actual structures in these classes, and then integrated them into the training set (Figure S5). The biosynthetically plausible analogs were created as follows:

1. Addition of methyl groups to hydroxy groups to generate methoxy groups
2. Replacement of methoxy groups with hydroxy groups

All duplicate structures that were generated during the data augmentation process were filtered and removed by comparing their InChIKeys. Augmentation was done for 47,108 structures resulting in 125,580 chemical entities in the training set.

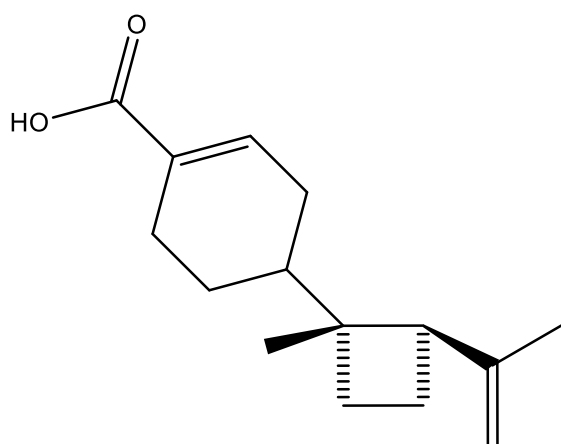

(-)-dunniane

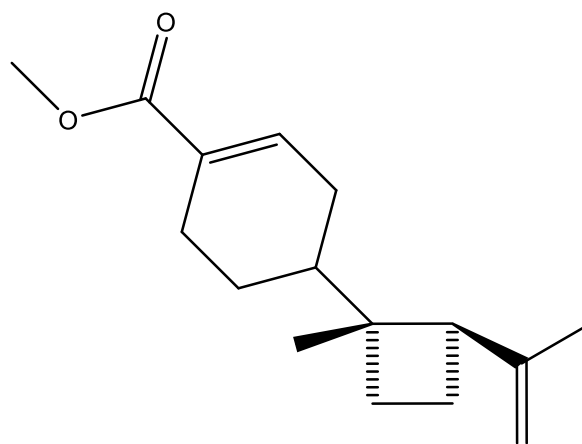

(-)-dunniane methyl ester  
(Not real compound)

**Figure S5** (-)-Dunniane (left) and its artificially modified methyl ester structure (right) as an illustration of data augmentation.

**Preparing an external evaluation test set.** To evaluate and compare the performance between different platforms, compound Classes that were included in both the NPClassifier and ClassyFire platforms were chosen from the Dictionary of Natural Products (<http://dnp.chemnetbase.com/>). In the external test set, 3,000 chemical entities for three Pathways (amino acid-peptides, polyketides, and terpenoids), 3,000 compounds for three Superclasses (flavonoids, lignans, and steroids), and 6,200 compounds for sixty-two Classes were included. As these structures are from a commercial library, this data was only used for testing, and were not included in the training set of NPClassifier.

**Data labelling and Evaluation metric.** For the output of NPClassifier, each unique category from the three classification levels were encoded by the binary encoding method. For the Pathway designation, “*Polyketides*” was defined as [0,0,0,0,1,0,0], and “*Amino acids and Peptides*” were defined as [0,1,0,0,0,0,0]. If the molecules were biosynthesized from a hybrid of “*Polyketides*” and “*Amino acids and Peptides*”, they were defined as [0,1,0,0,1,0,0]. We used cosine scores to measure the similarity between these binarized vectors, and this allowed comparison between the predicted results and the ground truth results during training.

To compare the performance between each model, average precision, mean average precision, and F1 scores were computed from the results. In the precision recall curves, the tradeoff between precision and recall was shown for different thresholds. A high area under the curve represents both high recall and high precision, where high precision relates to a low false positive rate, and high recall relates to a low false negative rate. Thus, high scores for both demonstrate that the classifier is returning accurate results. Average precision (AP) summarizes a precision-recall curve as the weighted mean of precisions achieved at each threshold, with the increase in recall from the

previous threshold used as the weight:

$$AP = \sum_{k=1}^n (R_k - R_{k-1})P_k$$

where  $P_k$  and  $R_k$  are the precision and recall at the  $k^{\text{th}}$  threshold.

Mean average precision (mAP) is the average AP from  $k$  classes in order to measure the performance of multi-label classification problems.<sup>54</sup>

$$mAP = \frac{1}{k} \sum_{i=1}^k AP_i$$

F1 score is defined as the harmonic mean of precision and recall. This score is often used in the field of information retrieval for measuring search, document classification, and query classification performance.

$$F1 \text{ score} = 2 \times \frac{\textit{Precision} \times \textit{Recall}}{\textit{Precision} + \textit{Recall}}$$

**Deep Neural Network Architectures.** The DNN for the NPClassifier was composed of three different networks that classified the molecular structure at the three levels noted (Pathway, Superclass, Class) with feed-forward neural network architecture. (We tested and compared random forest (RF) and deep neural network (DNN) architectures in preliminary studies. We found, using a small dataset that was available at the time, that the DNN gave the best performance; average precision, 0.95 using DNN, and 0.81 using RF). For each network, there is an input layer, representing the counted fingerprints, followed by three hidden layers and a fully-connected layer

to the output. Dropout was applied to the fully-connected layers to improve generalization. The activation function for the hidden layers used the ReLu function and all hidden layers were normalized by batch normalization to avoid problems of overfitting and vanishing gradient.<sup>55</sup>

In natural products classification, many multi-labelled cases are encountered. For example, the plant alkaloid, halfordinol, contains two chemical moieties (Figure S6). One moiety is a pyridine ring from nicotinic acid, and the other is an oxazole deriving from tyrosine.<sup>56,57</sup> Thus, this molecule derives from two amino acids and can be classified as both a pyridine alkaloid and an oxazole alkaloid.

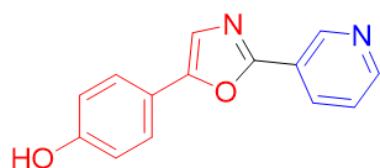

Superclass: Alkaloids

Class: Tyrosine alkaloids. Nicotinic acid alkaloids

Subclass: Oxazole alkaloid Pyridine alkaloid

**Figure S6** An example of a molecule possessing multi-components. The halfordinol contains oxazole and pyridine moieties that derive from tyrosine and nicotinic acid, respectively.

Following from this example, the classification of natural products was considered as a multiclass and multilabel situation, and thus a sigmoid function and a binary cross-entropy objective function was used for the output layers.<sup>58</sup>

**Hyperparameters.** The training of DNNs is affected by independent adjustable parameters known as ‘hyperparameters’, which include the learning rate, optimizer, batch size, the number of hidden layers, epochs, and others.<sup>59</sup> The numbers of hidden layers, neurons, and regularization rates are also considered as hyperparameters. Accordingly, the performance of neural networks depends on how the hyperparameters are tuned, which can only be done by repeated experimentation (Figure S7). Hyperparameters were optimized by the Hyperband algorithm in

Keras Tuner. 254 combinations of hyperparameters were tried and the hyperparameters with the lowest validation loss was chosen. The optimized hyperparameter set used for NPClassifier is shown in Table S1. The source code for NPClassifier is available on GitHub at <https://github.com/mwang87/NP-Classifier>.

**Table S1. Hyperparameters for training the deep neural networks for NPClassifier**

|                      |                                           |
|----------------------|-------------------------------------------|
| Optimizer            | Adam                                      |
| Activation functions | ReLU (hidden layers), sigmoid (top layer) |
| Hidden layer units   | 3072, 2304, 1152                          |
| Loss function        | Binary cross-entropy                      |
| Learning rate        | 0.00001 (decay = $1 \cdot e^{-6}$ )       |
| Batch normalization  | Used                                      |
| Dropout rate         | 0.1                                       |
| Batch size           | 128                                       |
| Regularization       | Early stopping (patience = 5)             |

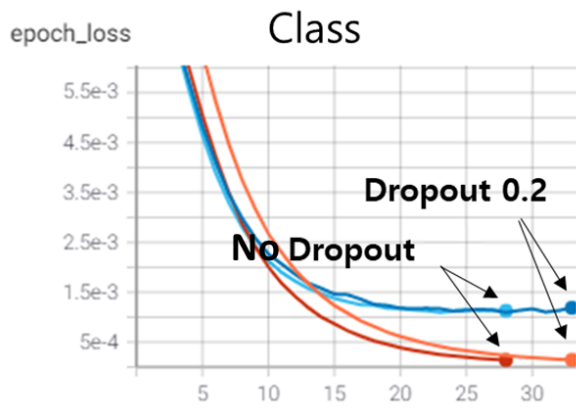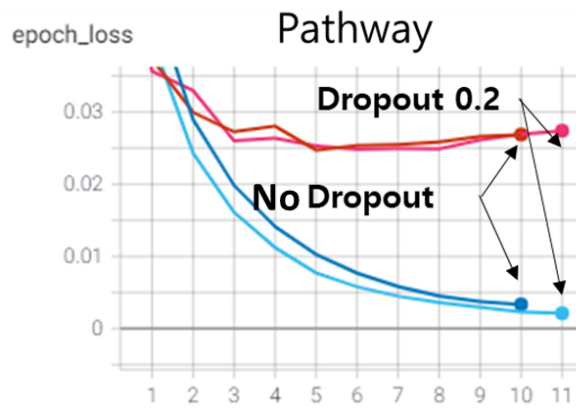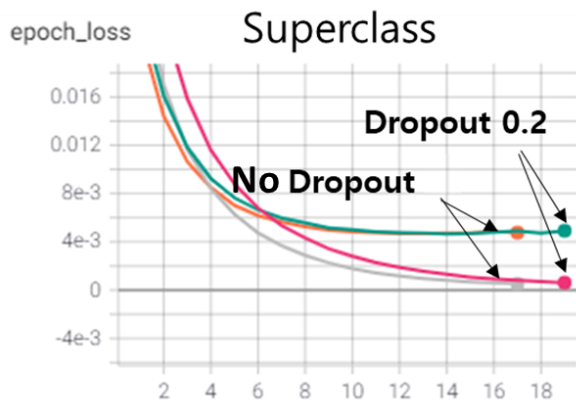

Figure S7 Effect of dropout regularization in the training of NPClassifier (logscale).

### 3. Classification schema and evaluation of NPClassifier

| Pathway   | Superclass                 | Class                                            | Precision and Recall of Class |        |          | Population |
|-----------|----------------------------|--------------------------------------------------|-------------------------------|--------|----------|------------|
|           |                            |                                                  | Precision                     | Recall | F1 score |            |
| Alkaloids | Ornithine alkaloids        | Stemona alkaloids                                | 1.000                         | 1.000  | 1.000    | 112        |
| Alkaloids | Tyrosine alkaloids         | Acutumine alkaloids                              | 1.000                         | 1.000  | 1.000    | 12         |
| Alkaloids | Tyrosine alkaloids         | Betalain alkaloids                               | 0.909                         | 0.833  | 1.000    | 19         |
| Alkaloids | Tyrosine alkaloids         | Cephalotaxus alkaloids                           | 1.000                         | 1.000  | 1.000    | 10         |
| Alkaloids | Tryptophan alkaloids       | Hapalindole alkaloids                            | 1.000                         | 1.000  | 1.000    | 18         |
| Alkaloids | Tryptophan alkaloids       | Pyroloindole alkaloids                           | 1.000                         | 1.000  | 1.000    | 66         |
| Alkaloids | Anthranilic acid alkaloids | Phenoxazine alkaloids                            | 1.000                         | 1.000  | 1.000    | 26         |
| Alkaloids | Guanidine alkaloids        | Saxitoxins                                       | 1.000                         | 1.000  | 1.000    | 9          |
| Alkaloids | Guanidine alkaloids        | Tetrodotoxins                                    | 1.000                         | 1.000  | 1.000    | 26         |
| Alkaloids | Guanidine alkaloids        | Acyclic guanidine alkaloids                      | 1.000                         | 1.000  | 1.000    | 4          |
| Alkaloids | Guanidine alkaloids        | Bicyclic guanidine alkaloids                     | 1.000                         | 1.000  | 1.000    | 17         |
| Alkaloids | Guanidine alkaloids        | Monocyclic guanidine alkaloids                   | 1.000                         | 1.000  | 1.000    | 6          |
| Alkaloids | Pseudoalkaloids            | Cytochalasan alkaloids                           | 1.000                         | 1.000  | 1.000    | 125        |
| Alkaloids | Pseudoalkaloids            | Capsaicins and Capsaicinoids                     | 0.833                         | 0.714  | 1.000    | 17         |
| Alkaloids | Pseudoalkaloids            | Isariotin alkaloids                              | 1.000                         | 1.000  | 1.000    | 10         |
| Alkaloids | Peptide alkaloids          | Indole diketopiperazine alkaloids (L-Trp, L-Pro) | 1.000                         | 1.000  | 1.000    | 47         |
| Alkaloids | Peptide alkaloids          | Indole diketopiperazine alkaloids (L-Trp, L-Trp) | 1.000                         | 1.000  | 1.000    | 13         |
| Alkaloids | Peptide alkaloids          | Other indole diketopiperazine alkaloids          | 0.966                         | 0.933  | 1.000    | 43         |
| Alkaloids | Tetramate alkaloids        | Pyrocidine tetramate alkaloids                   | 1.000                         | 1.000  | 1.000    | 25         |
| Alkaloids | Tetramate alkaloids        | Cyclopiazonic acid-type tetramate alkaloids      | 1.000                         | 1.000  | 1.000    | 24         |
| Alkaloids | Tetramate alkaloids        | Simple tetramate alkaloids                       | 0.917                         | 0.846  | 1.000    | 18         |
| Alkaloids | Mitomycin derivatives      | Mitomycins                                       | 1.000                         | 1.000  | 1.000    | 12         |
| Alkaloids | Proline alkaloids          | Prodigiosins                                     | 1.000                         | 1.000  | 1.000    | 26         |
| Alkaloids | Tryptophan alkaloids       | Carbazole alkaloids                              | 0.994                         | 1.000  | 0.988    | 406        |
| Alkaloids | Peptide alkaloids          | Ansa peptide alkaloids                           | 0.980                         | 1.000  | 0.960    | 128        |



|           |                            |                                           |       |       |       |     |
|-----------|----------------------------|-------------------------------------------|-------|-------|-------|-----|
| Alkaloids | Tryptophan alkaloids       | Aspidosperma type                         | 0.946 | 0.936 | 0.957 | 241 |
| Alkaloids | Tryptophan alkaloids       | Indole-Diterpenoid alkaloids (Penitremes) | 0.971 | 1.000 | 0.944 | 90  |
| Alkaloids | Tyrosine alkaloids         | Morphinan alkaloids                       | 0.959 | 0.986 | 0.934 | 408 |
| Alkaloids | Guanidine alkaloids        | Pentacyclic guanidine alkaloids           | 0.966 | 1.000 | 0.933 | 36  |
| Alkaloids | Tyrosine alkaloids         | Hasubanan alkaloids                       | 0.929 | 0.929 | 0.929 | 37  |
| Alkaloids | Tryptophan alkaloids       | Ergot alkaloids                           | 0.963 | 1.000 | 0.929 | 72  |
| Alkaloids | Tryptophan alkaloids       | Carboline alkaloids                       | 0.951 | 0.978 | 0.925 | 734 |
| Alkaloids | Tryptophan alkaloids       | Iboga type                                | 0.960 | 1.000 | 0.923 | 135 |
| Alkaloids | Ornithine alkaloids        | Tropane alkaloids                         | 0.958 | 1.000 | 0.920 | 292 |
| Alkaloids | Pseudoalkaloids            | Steroidal alkaloids                       | 0.948 | 0.986 | 0.913 | 405 |
| Alkaloids | Anthranilic acid alkaloids | Acridone alkaloids                        | 0.954 | 1.000 | 0.912 | 285 |
| Alkaloids | Tryptophan alkaloids       | Corynanthe type                           | 0.838 | 0.775 | 0.912 | 177 |
| Alkaloids | Tyrosine alkaloids         | Protoberberine alkaloids                  | 0.949 | 1.000 | 0.903 | 170 |
| Alkaloids | Lysine alkaloids           | Quinolizidine alkaloids                   | 0.925 | 0.949 | 0.902 | 216 |
| Alkaloids | Tyrosine alkaloids         | Phenethylisoquinoline alkaloids           | 0.947 | 1.000 | 0.900 | 102 |
| Alkaloids | Tryptophan alkaloids       | Pyrroloquinoline alkaloids                | 0.918 | 0.966 | 0.875 | 178 |
| Alkaloids | Serine alkaloids           | Thiazole alkaloids                        | 0.933 | 1.000 | 0.875 | 32  |
| Alkaloids | Pseudoalkaloids            | Purine alkaloids                          | 0.876 | 0.886 | 0.867 | 235 |
| Alkaloids | Tyrosine alkaloids         | Isoquinoline alkaloids                    | 0.806 | 0.757 | 0.862 | 903 |
| Alkaloids | Ornithine alkaloids        | Polyamines                                | 0.918 | 0.986 | 0.859 | 434 |
| Alkaloids | Tryptophan alkaloids       | Strychnos type                            | 0.906 | 0.960 | 0.857 | 146 |
| Alkaloids | Pseudoalkaloids            | Phenylalanine-derived alkaloids           | 0.889 | 0.923 | 0.857 | 143 |
| Alkaloids | Miscellaneous alkaloids    | Miscellaneous alkaloids                   | 0.923 | 1.000 | 0.857 | 18  |
| Alkaloids | Pseudoalkaloids            | Terpenoid alkaloids                       | 0.902 | 0.965 | 0.846 | 335 |
| Alkaloids | Anthranilic acid alkaloids | Anthranilic acid derivatives              | 0.889 | 0.941 | 0.842 | 43  |
| Alkaloids | Ornithine alkaloids        | Pyrrolizidine alkaloids                   | 0.897 | 0.972 | 0.833 | 218 |
| Alkaloids | Tyrosine alkaloids         | Protopine alkaloids                       | 0.909 | 1.000 | 0.833 | 28  |
| Alkaloids | Tyrosine alkaloids         | Aporphine alkaloids                       | 0.907 | 1.000 | 0.830 | 237 |
| Alkaloids | Pseudoalkaloids            | pteridine alkaloids                       | 0.905 | 1.000 | 0.826 | 115 |
| Alkaloids | Anthranilic acid alkaloids | Phenazine alkaloids                       | 0.903 | 1.000 | 0.824 | 86  |

|           |                            |                                                  |       |       |       |     |
|-----------|----------------------------|--------------------------------------------------|-------|-------|-------|-----|
| Alkaloids | Anthranilic acid alkaloids | Benzodiazepine alkaloids                         | 0.903 | 1.000 | 0.824 | 49  |
| Alkaloids | Tyrosine alkaloids         | Phenylethylamines                                | 0.901 | 1.000 | 0.821 | 215 |
| Alkaloids | Tryptophan alkaloids       | Simple oxindole alkaloids                        | 0.889 | 1.000 | 0.800 | 21  |
| Alkaloids | Tryptophan alkaloids       | Aspidosperma-Iboga hybrid type (Vinca alkaloids) | 0.667 | 0.571 | 0.800 | 56  |
| Alkaloids | Pseudoalkaloids            | Isoindole alkaloids                              | 0.889 | 1.000 | 0.800 | 72  |
| Alkaloids | Peptide alkaloids          | Indole diketopiperazine alkaloids (L-Trp, L-Ala) | 0.880 | 1.000 | 0.786 | 39  |
| Alkaloids | Tyrosine alkaloids         | Amarylidaceae alkaloids                          | 0.833 | 0.889 | 0.784 | 253 |
| Alkaloids | Anthranilic acid alkaloids | Quinazoline alkaloids                            | 0.839 | 0.929 | 0.765 | 88  |
| Alkaloids | Peptide alkaloids          | Thiodiketopiperazine alkaloids                   | 0.839 | 0.929 | 0.765 | 87  |
| Alkaloids | Peptide alkaloids          | Simple diketopiperazine alkaloids                | 0.857 | 1.000 | 0.750 | 28  |
| Alkaloids | Tryptophan alkaloids       | Yohimbine-like alkaloids                         | 0.842 | 1.000 | 0.727 | 63  |
| Alkaloids | Nicotinic acid alkaloids   | Pyridine alkaloids                               | 0.802 | 0.901 | 0.722 | 623 |
| Alkaloids | Pseudoalkaloids            | Azo and Azoxy alkaloids                          | 0.818 | 1.000 | 0.692 | 71  |
| Alkaloids | Lysine alkaloids           | Piperidine alkaloids                             | 0.771 | 0.914 | 0.667 | 259 |
| Alkaloids | Tyrosine alkaloids         | Terpenoid tetrahydroisoquinoline alkaloids       | 0.800 | 1.000 | 0.667 | 57  |
| Alkaloids | Tyrosine alkaloids         | Homoerythrina alkaloids                          | 0.667 | 0.667 | 0.667 | 10  |
| Alkaloids | Tryptophan alkaloids       | Quinoline alkaloids                              | 0.791 | 1.000 | 0.654 | 132 |
| Alkaloids | Anthranilic acid alkaloids | Quinoline alkaloids                              | 0.791 | 1.000 | 0.654 | 132 |
| Alkaloids | Histidine alkaloids        | Imidazole alkaloids                              | 0.744 | 0.879 | 0.644 | 236 |
| Alkaloids | Peptide alkaloids          | Pyrazine and Piperazine alkaloids                | 0.682 | 0.938 | 0.536 | 142 |
| Alkaloids | Tetramate alkaloids        | Pyrazine and Piperazine alkaloids                | 0.682 | 0.938 | 0.536 | 142 |
| Alkaloids | Peptide alkaloids          | Simple amide alkaloids                           | 0.667 | 0.920 | 0.523 | 199 |
| Alkaloids | Tyrosine alkaloids         | Tetrahydroisoquinoline alkaloids                 | 0.683 | 1.000 | 0.519 | 156 |
| Alkaloids | Tyrosine alkaloids         | Oxazole alkaloids                                | 0.667 | 1.000 | 0.500 | 10  |
| Alkaloids | Ornithine alkaloids        | Pyrrolidine alkaloids                            | 0.636 | 0.933 | 0.483 | 150 |
| Alkaloids | Proline alkaloids          | Pyrrole alkaloids                                | 0.632 | 1.000 | 0.462 | 66  |
| Alkaloids | Lysine alkaloids           | Indolizidine alkaloids                           | 0.615 | 0.941 | 0.457 | 187 |
| Alkaloids | Guanidine alkaloids        | Tricyclic guanidine alkaloids                    | 0.545 | 1.000 | 0.375 | 27  |
| Alkaloids | Tryptophan alkaloids       | Simple indole alkaloids                          | 0.526 | 1.000 | 0.357 | 144 |
| Alkaloids | Pseudoalkaloids            | Acetate-derived alkaloids                        | 0.400 | 0.500 | 0.333 | 19  |

|                          |                         |                                                  |       |       |       |     |
|--------------------------|-------------------------|--------------------------------------------------|-------|-------|-------|-----|
| Amino acids and Peptides | Macrolides              | Epothilones                                      | 1.000 | 1.000 | 1.000 | 63  |
| Amino acids and Peptides | Macrolides              | Rhizoxins                                        | 1.000 | 1.000 | 1.000 | 8   |
| Amino acids and Peptides | Macrolides              | Macrolide lactams                                | 1.000 | 1.000 | 1.000 | 35  |
| Amino acids and Peptides | Macrolides              | Lactam bearing macrolide lactones                | 0.976 | 0.952 | 1.000 | 24  |
| Amino acids and Peptides | Macrolides              | Antimycins                                       | 1.000 | 1.000 | 1.000 | 48  |
| Amino acids and Peptides | Macrolides              | Macrocyclic tetramic acids                       | 1.000 | 1.000 | 1.000 | 46  |
| Amino acids and Peptides | Linear polyketides      | Elfamycins                                       | 1.000 | 1.000 | 1.000 | 10  |
| Amino acids and Peptides | Linear polyketides      | DKXanthenes and derivatives                      | 1.000 | 1.000 | 1.000 | 13  |
| Amino acids and Peptides | Cyclic polyketides      | 3-Spirotetramic acids                            | 1.000 | 1.000 | 1.000 | 22  |
| Amino acids and Peptides | Peptide alkaloids       | Indole diketopiperazine alkaloids (L-Trp, L-Pro) | 1.000 | 1.000 | 1.000 | 47  |
| Amino acids and Peptides | Peptide alkaloids       | Indole diketopiperazine alkaloids (L-Trp, L-Trp) | 1.000 | 1.000 | 1.000 | 13  |
| Amino acids and Peptides | Peptide alkaloids       | Other indole diketopiperazine alkaloids          | 0.966 | 0.933 | 1.000 | 43  |
| Amino acids and Peptides | Tetramate alkaloids     | Pyrocidine tetramate alkaloids                   | 1.000 | 1.000 | 1.000 | 25  |
| Amino acids and Peptides | Tetramate alkaloids     | Cyclopiazonic acid-type tetramate alkaloids      | 1.000 | 1.000 | 1.000 | 24  |
| Amino acids and Peptides | Mycosporine derivatives | Mycosporine and Mycosporine-like amino acids     | 1.000 | 1.000 | 1.000 | 27  |
| Amino acids and Peptides | Oligopeptides           | Aeruginosins                                     | 1.000 | 1.000 | 1.000 | 46  |
| Amino acids and Peptides | Oligopeptides           | Microginins                                      | 1.000 | 1.000 | 1.000 | 41  |
| Amino acids and Peptides | Oligopeptides           | Anabaenopeptins                                  | 0.976 | 0.952 | 1.000 | 38  |
| Amino acids and Peptides | Oligopeptides           | Microcystins                                     | 1.000 | 1.000 | 1.000 | 59  |
| Amino acids and Peptides | Oligopeptides           | Microcolins and mirabimides                      | 1.000 | 1.000 | 1.000 | 16  |
| Amino acids and Peptides | Oligopeptides           | Tantazoles and mirabazoles                       | 1.000 | 1.000 | 1.000 | 7   |
| Amino acids and Peptides | Oligopeptides           | Vancomycins and Teicoplanins                     | 1.000 | 1.000 | 1.000 | 283 |
| Amino acids and Peptides | Oligopeptides           | Streptogramins                                   | 1.000 | 1.000 | 1.000 | 14  |
| Amino acids and Peptides | Oligopeptides           | Actinomycins                                     | 1.000 | 1.000 | 1.000 | 99  |
| Amino acids and Peptides | $\beta$ -lactams        | Penicillins                                      | 1.000 | 1.000 | 1.000 | 101 |
| Amino acids and Peptides | $\beta$ -lactams        | Cephalosporins                                   | 0.973 | 0.947 | 1.000 | 90  |
| Amino acids and Peptides | $\beta$ -lactams        | Cephamycins                                      | 1.000 | 1.000 | 1.000 | 19  |
| Amino acids and Peptides | $\beta$ -lactams        | Clavams                                          | 1.000 | 1.000 | 1.000 | 13  |
| Amino acids and Peptides | $\beta$ -lactams        | Carbapenems                                      | 1.000 | 1.000 | 1.000 | 30  |
| Amino acids and Peptides | $\beta$ -lactams        | Monocyclic $\beta$ -lactams                      | 1.000 | 1.000 | 1.000 | 3   |

|                          |                                     |                                                  |       |       |       |      |
|--------------------------|-------------------------------------|--------------------------------------------------|-------|-------|-------|------|
| Amino acids and Peptides | $\gamma$ -lactam- $\beta$ -lactones | Salinosporamides                                 | 1.000 | 1.000 | 1.000 | 8    |
| Amino acids and Peptides | Oligopeptides                       | RiPPs-Amatoxins and Phallotoxins                 | 1.000 | 1.000 | 1.000 | 8    |
| Amino acids and Peptides | Oligopeptides                       | RiPPs-Botromycins                                | 1.000 | 1.000 | 1.000 | 4    |
| Amino acids and Peptides | Oligopeptides                       | RiPPs-Lasso peptides                             | 1.000 | 1.000 | 1.000 | 6    |
| Amino acids and Peptides | Oligopeptides                       | RiPPs-Microcins                                  | 1.000 | 1.000 | 1.000 | 4    |
| Amino acids and Peptides | Peptide alkaloids                   | Ansa peptide alkaloids                           | 0.980 | 1.000 | 0.960 | 128  |
| Amino acids and Peptides | Oligopeptides                       | Cyclic peptides                                  | 0.967 | 0.984 | 0.951 | 1232 |
| Amino acids and Peptides | Oligopeptides                       | RiPPs-Thiopeptides                               | 0.968 | 1.000 | 0.938 | 22   |
| Amino acids and Peptides | Oligopeptides                       | Depsipeptides                                    | 0.960 | 0.985 | 0.937 | 671  |
| Amino acids and Peptides | Amino acid glycosides               | Glucosinolates                                   | 0.966 | 1.000 | 0.933 | 74   |
| Amino acids and Peptides | Oligopeptides                       | Lipopeptides                                     | 0.929 | 0.929 | 0.929 | 284  |
| Amino acids and Peptides | Oligopeptides                       | RiPPs-Lanthipeptides                             | 0.962 | 1.000 | 0.926 | 17   |
| Amino acids and Peptides | Cyclic polyketides                  | 3-Decalinoyltetramic acids                       | 0.960 | 1.000 | 0.923 | 67   |
| Amino acids and Peptides | Oligopeptides                       | Linear peptides                                  | 0.927 | 0.935 | 0.918 | 247  |
| Amino acids and Peptides | Phenylpropanoids (C6-C3)            | Cinnamic acid amides                             | 0.952 | 1.000 | 0.909 | 24   |
| Amino acids and Peptides | Oligopeptides                       | Bleomycins                                       | 0.900 | 0.900 | 0.900 | 47   |
| Amino acids and Peptides | Oligopeptides                       | Cryptophycins                                    | 0.917 | 1.000 | 0.846 | 36   |
| Amino acids and Peptides | Oligopeptides                       | Peptaibols                                       | 0.917 | 1.000 | 0.846 | 66   |
| Amino acids and Peptides | Small peptides                      | Dipeptides                                       | 0.859 | 0.880 | 0.838 | 531  |
| Amino acids and Peptides | Small peptides                      | Aminoacids                                       | 0.883 | 0.935 | 0.837 | 486  |
| Amino acids and Peptides | Linear polyketides                  | Melithiazole and Myxothiazole derivatives        | 0.909 | 1.000 | 0.833 | 23   |
| Amino acids and Peptides | Linear polyketides                  | 3-acyl tetramic acids                            | 0.897 | 1.000 | 0.813 | 74   |
| Amino acids and Peptides | Peptide alkaloids                   | Indole diketopiperazine alkaloids (L-Trp, L-Ala) | 0.880 | 1.000 | 0.786 | 39   |
| Amino acids and Peptides | Peptide alkaloids                   | Thiodiketopiperazine alkaloids                   | 0.839 | 0.929 | 0.765 | 87   |
| Amino acids and Peptides | Peptide alkaloids                   | Simple diketopiperazine alkaloids                | 0.857 | 1.000 | 0.750 | 28   |
| Amino acids and Peptides | Small peptides                      | Tripeptides                                      | 0.819 | 0.919 | 0.739 | 231  |
| Amino acids and Peptides | Amino acid glycosides               | Cyanogenic glycosides                            | 0.800 | 1.000 | 0.667 | 34   |
| Amino acids and Peptides | Peptide alkaloids                   | Pyrazine and Piperazine alkaloids                | 0.682 | 0.938 | 0.536 | 142  |
| Amino acids and Peptides | Oligopeptides                       | RiPPs-Cyanobactins                               | 0.400 | 1.000 | 0.250 | 15   |
| Carbohydrates            | Polyols                             | Cyclitols                                        | 1.000 | 1.000 | 1.000 | 42   |

|               |                                 |                                         |       |       |       |     |
|---------------|---------------------------------|-----------------------------------------|-------|-------|-------|-----|
| Carbohydrates | Nucleosides                     | Streptothricins and derivatives         | 1.000 | 1.000 | 1.000 | 16  |
| Carbohydrates | Nucleosides                     | Purine nucleos(t)ides                   | 0.955 | 1.000 | 0.913 | 114 |
| Carbohydrates | Nucleosides                     | Pyrimidine nucleos(t)ides               | 0.947 | 1.000 | 0.900 | 99  |
| Carbohydrates | Saccharides                     | Disaccharides                           | 0.842 | 0.889 | 0.800 | 32  |
| Carbohydrates | Saccharides                     | Orthosomycins                           | 0.889 | 1.000 | 0.800 | 18  |
| Carbohydrates | Saccharides                     | Monosaccharides                         | 0.848 | 0.933 | 0.778 | 92  |
| Carbohydrates | Aminosugars and aminoglycosides | Aminoglycosides                         | 0.714 | 0.667 | 0.769 | 58  |
| Carbohydrates | Polyols                         | Amino cyclitols                         | 0.851 | 1.000 | 0.741 | 121 |
| Carbohydrates | Aminosugars and aminoglycosides | Aminosugars                             | 0.776 | 0.864 | 0.704 | 127 |
| Carbohydrates | Saccharides                     | Paulomycins and derivatives             | 0.800 | 1.000 | 0.667 | 16  |
| Carbohydrates | Saccharides                     | Polysaccharides                         | 0.714 | 1.000 | 0.556 | 51  |
| Fatty acids   | Fatty Acids and Conjugates      | Methoxy fatty acids                     | 0.966 | 0.933 | 1.000 | 32  |
| Fatty acids   | Fatty Acids and Conjugates      | Nitro fatty acids                       | 1.000 | 1.000 | 1.000 | 14  |
| Fatty acids   | Fatty Acids and Conjugates      | Mycolic acids                           | 1.000 | 1.000 | 1.000 | 130 |
| Fatty acids   | Octadecanoids                   | 12-oxophytodienoic acid metabolites     | 1.000 | 1.000 | 1.000 | 9   |
| Fatty acids   | Octadecanoids                   | Phytosteranes                           | 1.000 | 1.000 | 1.000 | 14  |
| Fatty acids   | Octadecanoids                   | Phytofurans                             | 1.000 | 1.000 | 1.000 | 4   |
| Fatty acids   | Eicosanoids                     | Leukotrienes                            | 0.988 | 0.976 | 1.000 | 49  |
| Fatty acids   | Eicosanoids                     | Thromboxanes                            | 1.000 | 1.000 | 1.000 | 11  |
| Fatty acids   | Eicosanoids                     | Lipoxins                                | 1.000 | 1.000 | 1.000 | 7   |
| Fatty acids   | Eicosanoids                     | Hydroxy-hydroperoxyeicosatrienoic acids | 0.923 | 0.857 | 1.000 | 17  |
| Fatty acids   | Eicosanoids                     | Epoxyeicosatrienoic acids               | 1.000 | 1.000 | 1.000 | 8   |
| Fatty acids   | Eicosanoids                     | Hepoxilins                              | 0.800 | 0.667 | 1.000 | 11  |
| Fatty acids   | Eicosanoids                     | Levuglandins                            | 1.000 | 1.000 | 1.000 | 9   |
| Fatty acids   | Eicosanoids                     | Isoprenes                               | 1.000 | 1.000 | 1.000 | 8   |
| Fatty acids   | Eicosanoids                     | Eicosa-1,2-dioxolanes                   | 1.000 | 1.000 | 1.000 | 2   |
| Fatty acids   | Eicosanoids                     | Resolvin Es                             | 0.941 | 0.889 | 1.000 | 9   |
| Fatty acids   | Eicosanoids                     | Clavulones                              | 1.000 | 1.000 | 1.000 | 33  |
| Fatty acids   | Docosanoids                     | Neuroprostanes                          | 1.000 | 1.000 | 1.000 | 40  |

|             |                       |                                       |       |       |       |      |
|-------------|-----------------------|---------------------------------------|-------|-------|-------|------|
| Fatty acids | Docosanoids           | Neurofurans                           | 1.000 | 1.000 | 1.000 | 16   |
| Fatty acids | Docosanoids           | Docosa-1,2-dioxolanes                 | 1.000 | 1.000 | 1.000 | 2    |
| Fatty acids | Docosanoids           | Resolvin Ds                           | 1.000 | 1.000 | 1.000 | 8    |
| Fatty acids | Fatty esters          | Fatty acyl CoAs                       | 1.000 | 1.000 | 1.000 | 265  |
| Fatty acids | Fatty esters          | Fatty acyl carnitines                 | 1.000 | 1.000 | 1.000 | 90   |
| Fatty acids | Fatty amides          | Fatty acyl homoserine lactones        | 1.000 | 1.000 | 1.000 | 37   |
| Fatty acids | Fatty acyls           | Fatty ethers                          | 1.000 | 1.000 | 1.000 | 3    |
| Fatty acids | Fatty acyl glycosides | Sophorolipids                         | 1.000 | 1.000 | 1.000 | 4    |
| Fatty acids | Fatty acyl glycosides | Rhamnolipids                          | 0.971 | 0.944 | 1.000 | 16   |
| Fatty acids | Glycerolipids         | Monoacylglycerols                     | 1.000 | 1.000 | 1.000 | 53   |
| Fatty acids | Glycerolipids         | Glycosylmonoacylglycerols             | 1.000 | 1.000 | 1.000 | 7    |
| Fatty acids | Glycerophospholipids  | Glycerophosphocholines                | 1.000 | 1.000 | 1.000 | 1724 |
| Fatty acids | Glycerophospholipids  | Glycerophosphoserines                 | 1.000 | 1.000 | 1.000 | 1219 |
| Fatty acids | Glycerophospholipids  | Glycerophosphoglycerophosphates       | 1.000 | 1.000 | 1.000 | 3    |
| Fatty acids | Glycerophospholipids  | Glycerophosphoinositols               | 1.000 | 1.000 | 1.000 | 1188 |
| Fatty acids | Glycerophospholipids  | Glycerophosphoinositol phosphates     | 1.000 | 1.000 | 1.000 | 7    |
| Fatty acids | Glycerophospholipids  | Glycerophosphates                     | 1.000 | 1.000 | 1.000 | 1198 |
| Fatty acids | Glycerophospholipids  | Glycerophosphoglycerophosphoglycerols | 1.000 | 1.000 | 1.000 | 666  |
| Fatty acids | Glycerophospholipids  | CDP-Glycerols                         | 1.000 | 1.000 | 1.000 | 36   |
| Fatty acids | Glycerophospholipids  | Glycosylglycerophospholipids          | 1.000 | 1.000 | 1.000 | 5    |
| Fatty acids | Glycerophospholipids  | Glycerophosphoinositolglycans         | 1.000 | 1.000 | 1.000 | 113  |
| Fatty acids | Glycerophospholipids  | Oxidized glycerophospholipids         | 1.000 | 1.000 | 1.000 | 245  |
| Fatty acids | Glycerophospholipids  | Long-Chain Bicyclic Phosphotriester   | 1.000 | 1.000 | 1.000 | 30   |
| Fatty acids | Sphingolipids         | Acidic glycosphingolipids             | 1.000 | 1.000 | 1.000 | 13   |
| Fatty acids | Fatty acyls           | Resin glycosides                      | 0.983 | 0.967 | 1.000 | 145  |
| Fatty acids | Fatty acyls           | Paraconic acids and derivatives       | 1.000 | 1.000 | 1.000 | 18   |
| Fatty acids | Fatty acyls           | Halogenated hydrocarbons              | 1.000 | 1.000 | 1.000 | 43   |
| Fatty acids | Glycerolipids         | Triacylglycerols                      | 1.000 | 1.000 | 0.999 | 6889 |
| Fatty acids | Glycerophospholipids  | Glycerophosphoethanolamines           | 0.996 | 0.996 | 0.996 | 1336 |
| Fatty acids | Glycerophospholipids  | Glycerophosphoglycerols               | 0.998 | 1.000 | 0.996 | 1209 |

|             |                            |                                           |       |       |       |     |
|-------------|----------------------------|-------------------------------------------|-------|-------|-------|-----|
| Fatty acids | Fatty acyls                | Hydrocarbons                              | 0.989 | 0.985 | 0.992 | 654 |
| Fatty acids | Sphingolipids              | Phosphosphingolipids                      | 0.992 | 1.000 | 0.985 | 326 |
| Fatty acids | Sphingolipids              | Ceramides                                 | 0.987 | 1.000 | 0.975 | 200 |
| Fatty acids | Glycerolipids              | Diacylglycerols                           | 0.987 | 1.000 | 0.974 | 570 |
| Fatty acids | Fatty acyl glycosides      | Ascarosides                               | 0.983 | 1.000 | 0.967 | 152 |
| Fatty acids | Sphingolipids              | Neutral glycosphingolipids                | 0.982 | 1.000 | 0.966 | 143 |
| Fatty acids | Fatty esters               | Fatty acid estolides                      | 0.981 | 1.000 | 0.963 | 123 |
| Fatty acids | Fatty acyls                | Fatty aldehydes                           | 0.938 | 0.927 | 0.950 | 201 |
| Fatty acids | Fatty Acids and Conjugates | Branched fatty acids                      | 0.902 | 0.871 | 0.937 | 395 |
| Fatty acids | Eicosanoids                | Isoprostanes                              | 0.900 | 0.871 | 0.931 | 38  |
| Fatty acids | Fatty esters               | Wax monoesters                            | 0.952 | 0.977 | 0.929 | 905 |
| Fatty acids | Glycerolipids              | Glycosyldiacylglycerols                   | 0.960 | 1.000 | 0.923 | 35  |
| Fatty acids | Fatty Acids and Conjugates | Hydroperoxy fatty acids                   | 0.957 | 1.000 | 0.917 | 27  |
| Fatty acids | Fatty Acids and Conjugates | Heterocyclic fatty acids                  | 0.957 | 1.000 | 0.917 | 60  |
| Fatty acids | Fatty acyls                | Oxygenated hydrocarbons                   | 0.955 | 1.000 | 0.914 | 289 |
| Fatty acids | Fatty amides               | N-acyl ethanolamines (endocannabinoids)   | 0.952 | 1.000 | 0.909 | 56  |
| Fatty acids | Fatty Acids and Conjugates | Unsaturated fatty acids                   | 0.901 | 0.895 | 0.906 | 794 |
| Fatty acids | Fatty Acids and Conjugates | Epoxy fatty acids                         | 0.800 | 0.727 | 0.889 | 32  |
| Fatty acids | Fatty Acids and Conjugates | Carbocyclic fatty acids                   | 0.909 | 0.938 | 0.882 | 85  |
| Fatty acids | Fatty amides               | N-acyl amines                             | 0.928 | 0.978 | 0.882 | 255 |
| Fatty acids | Eicosanoids                | Prostaglandins                            | 0.900 | 0.947 | 0.857 | 167 |
| Fatty acids | Fatty Acids and Conjugates | Amino fatty acids                         | 0.882 | 0.938 | 0.833 | 40  |
| Fatty acids | Fatty Acids and Conjugates | Oxo fatty acids                           | 0.778 | 0.757 | 0.800 | 173 |
| Fatty acids | Fatty Acids and Conjugates | Oxo fatty acids                           | 0.778 | 0.757 | 0.800 | 173 |
| Fatty acids | Fatty Acids and Conjugates | Dicarboxylic acids                        | 0.851 | 0.909 | 0.800 | 121 |
| Fatty acids | Octadecanoids              | Jasmonic acids                            | 0.889 | 1.000 | 0.800 | 11  |
| Fatty acids | Eicosanoids                | Hydroxy-hydroperoxyeicosatetraenoic acids | 0.842 | 0.889 | 0.800 | 52  |
| Fatty acids | Eicosanoids                | Hydroxy-hydroperoxyeicosapentaenoic acids | 0.857 | 0.923 | 0.800 | 26  |
| Fatty acids | Fatty esters               | Cyano esters                              | 0.889 | 1.000 | 0.800 | 24  |
| Fatty acids | Sphingolipids              | Sphingoid bases                           | 0.889 | 1.000 | 0.800 | 77  |

|             |                            |                                                  |       |       |       |     |
|-------------|----------------------------|--------------------------------------------------|-------|-------|-------|-----|
| Fatty acids | Fatty acyls                | Fatty alcohols                                   | 0.866 | 0.951 | 0.795 | 366 |
| Fatty acids | Fatty esters               | Lactones                                         | 0.850 | 1.000 | 0.739 | 114 |
| Fatty acids | Octadecanoids              | Other Octadecanoids                              | 0.795 | 0.917 | 0.702 | 238 |
| Fatty acids | Docosanoids                | Other Docosanoids                                | 0.706 | 0.750 | 0.667 | 51  |
| Fatty acids | Fatty acyl glycosides      | Fatty acyl glycosides of mono- and disaccharides | 0.778 | 1.000 | 0.636 | 56  |
| Fatty acids | Fatty Acids and Conjugates | Hydroxy fatty acids                              | 0.772 | 1.000 | 0.629 | 291 |
| Fatty acids | Fatty Acids and Conjugates | Hydroxy fatty acids                              | 0.772 | 1.000 | 0.629 | 291 |
| Fatty acids | Eicosanoids                | Other Eicosanoids                                | 0.667 | 0.800 | 0.571 | 16  |
| Fatty acids | Fatty amides               | Primary amides                                   | 0.600 | 0.750 | 0.500 | 27  |
| Fatty acids | Fatty acyls                | Fatty nitriles                                   | 0.667 | 1.000 | 0.500 | 5   |
| Fatty acids | Fatty esters               | Wax diesters                                     | 0.500 | 1.000 | 0.333 | 19  |
| Polyketides | Macrolides                 | Tylosins                                         | 0.923 | 0.857 | 1.000 | 60  |
| Polyketides | Macrolides                 | Avermectins                                      | 1.000 | 1.000 | 1.000 | 169 |
| Polyketides | Macrolides                 | Ascomycins and Rapamycins                        | 1.000 | 1.000 | 1.000 | 88  |
| Polyketides | Macrolides                 | Ascomycins and Rapamycins                        | 1.000 | 1.000 | 1.000 | 88  |
| Polyketides | Macrolides                 | Epothilones                                      | 1.000 | 1.000 | 1.000 | 63  |
| Polyketides | Macrolides                 | Rhizoxins                                        | 1.000 | 1.000 | 1.000 | 8   |
| Polyketides | Macrolides                 | Oligomycins                                      | 1.000 | 1.000 | 1.000 | 18  |
| Polyketides | Macrolides                 | Bafilomycins                                     | 1.000 | 1.000 | 1.000 | 24  |
| Polyketides | Macrolides                 | Macrolide lactams                                | 1.000 | 1.000 | 1.000 | 35  |
| Polyketides | Macrolides                 | Lactam bearing macrolide lactones                | 0.976 | 0.952 | 1.000 | 24  |
| Polyketides | Macrolides                 | Enediynes                                        | 1.000 | 1.000 | 1.000 | 40  |
| Polyketides | Macrolides                 | Bryostatins                                      | 1.000 | 1.000 | 1.000 | 18  |
| Polyketides | Macrolides                 | Antimycins                                       | 1.000 | 1.000 | 1.000 | 48  |
| Polyketides | Macrolides                 | Oxa-Bridged Macrolides                           | 1.000 | 1.000 | 1.000 | 17  |
| Polyketides | Macrolides                 | Macrocyclic tetramic acids                       | 1.000 | 1.000 | 1.000 | 46  |
| Polyketides | Linear polyketides         | Linear tetronates                                | 1.000 | 1.000 | 1.000 | 7   |
| Polyketides | Linear polyketides         | Elfamycins                                       | 1.000 | 1.000 | 1.000 | 10  |
| Polyketides | Linear polyketides         | 3-oligoenoyltetramic acids                       | 1.000 | 1.000 | 1.000 | 58  |
| Polyketides | Linear polyketides         | Linear polyenes                                  | 0.980 | 0.960 | 1.000 | 47  |



|             |                                 |                                        |       |       |       |     |
|-------------|---------------------------------|----------------------------------------|-------|-------|-------|-----|
| Polyketides | Linear polyketides              | Polyesters                             | 1.000 | 1.000 | 1.000 | 6   |
| Polyketides | Linear polyketides              | DKXanthenes and derivatives            | 1.000 | 1.000 | 1.000 | 13  |
| Polyketides | Chromanes                       | Cytosporins                            | 1.000 | 1.000 | 1.000 | 12  |
| Polyketides | Cyclic polyketides              | Decalins with 2-pyrones                | 1.000 | 1.000 | 1.000 | 14  |
| Polyketides | Cyclic polyketides              | 3-Spirotetramic acids                  | 1.000 | 1.000 | 1.000 | 22  |
| Polyketides | Cyclic polyketides              | Nonadrides                             | 1.000 | 1.000 | 1.000 | 28  |
| Polyketides | Alkylresorcinols                | Monoalkylresorcinols                   | 0.889 | 0.800 | 1.000 | 8   |
| Polyketides | Alkylresorcinols                | Dialkylresorcinols                     | 1.000 | 1.000 | 1.000 | 47  |
| Polyketides | Chromanes                       | Aflatoxins                             | 1.000 | 1.000 | 1.000 | 68  |
| Polyketides | Aromatic polyketides            | Griseofulvins                          | 1.000 | 1.000 | 1.000 | 36  |
| Polyketides | Aromatic polyketides            | Catechols with side chains             | 1.000 | 1.000 | 1.000 | 237 |
| Polyketides | Aromatic polyketides            | Aromatic polyketides with side chains  | 1.000 | 1.000 | 1.000 | 25  |
| Polyketides | Aromatic polyketides            | Simple aromatic polyketides            | 1.000 | 1.000 | 1.000 | 46  |
| Polyketides | Aromatic polyketides            | Luminacins and derivatives             | 1.000 | 1.000 | 1.000 | 12  |
| Polyketides | Meroterpenoids                  | Cannabinoids                           | 1.000 | 1.000 | 1.000 | 136 |
| Polyketides | Polycyclic aromatic polyketides | Pradimicins                            | 1.000 | 1.000 | 1.000 | 7   |
| Polyketides | Polycyclic aromatic polyketides | Fasamycins and derivatives             | 1.000 | 1.000 | 1.000 | 35  |
| Polyketides | Polycyclic aromatic polyketides | Benastatins and derivatives            | 1.000 | 1.000 | 1.000 | 9   |
| Polyketides | Phloroglucinols                 | Phloroglucinol-terpene hybrids         | 1.000 | 1.000 | 1.000 | 35  |
| Polyketides | Phloroglucinols                 | Prenylated,geranylated phloroglucinols | 1.000 | 1.000 | 1.000 | 34  |
| Polyketides | Naphthalenes                    | Spirodioxynaphthalenes                 | 1.000 | 1.000 | 1.000 | 70  |
| Polyketides | Polyethers                      | Macrotetrolides                        | 1.000 | 1.000 | 1.000 | 26  |
| Polyketides | Tropolones                      | Tropolones and derivatives (PKS)       | 1.000 | 1.000 | 1.000 | 31  |
| Polyketides | Diphenyl ethers (DPEs)          | Fungal DPEs                            | 0.964 | 0.931 | 1.000 | 48  |
| Polyketides | Meroterpenoids                  | Triketide meroterpenoids               | 1.000 | 1.000 | 1.000 | 73  |
| Polyketides | Meroterpenoids                  | Other polyketide meroterpenoids        | 1.000 | 1.000 | 1.000 | 24  |
| Polyketides | Linear polyketides              | Phoslactomycins or Phosphazomycins     | 1.000 | 1.000 | 1.000 | 28  |

|             |                                 |                                                        |       |       |       |     |
|-------------|---------------------------------|--------------------------------------------------------|-------|-------|-------|-----|
| Polyketides | Polycyclic aromatic polyketides | Phenalens                                              | 1.000 | 1.000 | 1.000 | 9   |
| Polyketides | Naphthalenes                    | Naphthalenones                                         | 1.000 | 1.000 | 1.000 | 30  |
| Polyketides | Polycyclic aromatic polyketides | Ericamycins                                            | 1.000 | 1.000 | 1.000 | 28  |
| Polyketides | Aromatic polyketides            | Benzophenones                                          | 0.966 | 0.933 | 1.000 | 18  |
| Polyketides | Macrolides                      | Boromycins                                             | 0.923 | 0.857 | 1.000 | 13  |
| Polyketides | Macrolides                      | Aplysiatoxins                                          | 1.000 | 1.000 | 1.000 | 17  |
| Polyketides | Polycyclic aromatic polyketides | Duclauxin and derivatives                              | 1.000 | 1.000 | 1.000 | 23  |
| Polyketides | Macrolides                      | Ansa macrolides                                        | 0.992 | 1.000 | 0.984 | 608 |
| Polyketides | Meroterpenoids                  | Polyprenylated cyclic polyketides (Hop meroterpenoids) | 0.992 | 1.000 | 0.984 | 303 |
| Polyketides | Macrolides                      | Erythromycins                                          | 0.986 | 1.000 | 0.971 | 532 |
| Polyketides | Aromatic polyketides            | Depsides                                               | 0.985 | 1.000 | 0.971 | 342 |
| Polyketides | Linear polyketides              | Acetogenins                                            | 0.976 | 0.984 | 0.968 | 314 |
| Polyketides | Aromatic polyketides            | Depsidones                                             | 0.983 | 1.000 | 0.967 | 154 |
| Polyketides | Polycyclic aromatic polyketides | Tetracyclines                                          | 0.978 | 1.000 | 0.957 | 124 |
| Polyketides | Phloroglucinols                 | Acyl phloroglucinols                                   | 0.977 | 1.000 | 0.955 | 107 |
| Polyketides | Phloroglucinols                 | Oligomeric phloroglucinols (phlorotannins)             | 0.950 | 0.950 | 0.950 | 103 |
| Polyketides | Macrolides                      | Spirotetronate macrolides                              | 0.970 | 1.000 | 0.941 | 83  |
| Polyketides | Aromatic polyketides            | Sorbicilinoids                                         | 0.970 | 1.000 | 0.941 | 83  |
| Polyketides | Polycyclic aromatic polyketides | Anthracyclines                                         | 0.970 | 1.000 | 0.941 | 186 |
| Polyketides | Oligopeptides                   | Depsipeptides                                          | 0.960 | 0.985 | 0.937 | 671 |
| Polyketides | Cyclic polyketides              | 2-pyrone derivatives                                   | 0.951 | 0.967 | 0.935 | 311 |
| Polyketides | Aromatic polyketides            | Usnic acid and derivatives                             | 0.964 | 1.000 | 0.931 | 39  |
| Polyketides | Cyclic polyketides              | 3-Decalinoyltetramic acids                             | 0.960 | 1.000 | 0.923 | 67  |
| Polyketides | Cyclic polyketides              | 4-pyrone derivatives                                   | 0.917 | 0.917 | 0.917 | 41  |
| Polyketides | Polyethers                      | Ladder polyethers                                      | 0.957 | 1.000 | 0.917 | 58  |
| Polyketides | Cyclic polyketides              | Fungal cyclic polyketides (Miscellaneous)              | 0.957 | 1.000 | 0.917 | 26  |

|                                 |                                 |                                           |       |       |       |     |
|---------------------------------|---------------------------------|-------------------------------------------|-------|-------|-------|-----|
| Polyketides                     | Polycyclic aromatic polyketides | Anthraquinones and anthrones              | 0.918 | 0.929 | 0.907 | 639 |
| Polyketides                     | Macrolides                      | Polyene macrolides                        | 0.947 | 1.000 | 0.900 | 154 |
| Polyketides                     | Polyethers                      | Polyether ionophores                      | 0.941 | 1.000 | 0.889 | 97  |
| Polyketides                     | Chromanes                       | Azaphilones                               | 0.929 | 1.000 | 0.867 | 305 |
| Polyketides                     | Linear polyketides              | Melithiazole and Myxothiazole derivatives | 0.909 | 1.000 | 0.833 | 23  |
| Polyketides                     | Polycyclic aromatic polyketides | Angucyclines                              | 0.899 | 0.976 | 0.833 | 244 |
| Polyketides                     | Aromatic polyketides            | Strobilurins and derivatives              | 0.909 | 1.000 | 0.833 | 23  |
| Polyketides                     | Aromatic polyketides            | Benzoquinones                             | 0.909 | 1.000 | 0.833 | 17  |
| Polyketides                     | Xanthonenes                     | Methyl xanthonenes                        | 0.900 | 1.000 | 0.818 | 163 |
| Polyketides                     | Linear polyketides              | 3-acyl tetramic acids                     | 0.897 | 1.000 | 0.813 | 74  |
| Polyketides                     | Meroterpenoids                  | Tetraketide meroterpenoids                | 0.882 | 0.968 | 0.811 | 184 |
| Polyketides                     | Linear polyketides              | Open-chain polyketides                    | 0.864 | 0.961 | 0.785 | 453 |
| Polyketides                     | Cyclic polyketides              | Phthalide derivatives                     | 0.878 | 1.000 | 0.783 | 114 |
| Polyketides                     | Phloroglucinols                 | Dimeric phloroglucinols                   | 0.857 | 0.947 | 0.783 | 121 |
| Polyketides                     | Cyclic polyketides              | Monacolins and Monacolin derivatives      | 0.741 | 0.769 | 0.714 | 69  |
| Polyketides                     | Macrolides                      | Macrolide lactones                        | 0.821 | 1.000 | 0.696 | 116 |
| Polyketides                     | Chromanes                       | Chromones                                 | 0.791 | 0.944 | 0.680 | 241 |
| Polyketides                     | Naphthalenes                    | Bisnaphthalenes                           | 0.800 | 1.000 | 0.667 | 142 |
| Polyketides                     | Cyclic polyketides              | Decalins with side chains                 | 0.788 | 1.000 | 0.650 | 93  |
| Polyketides                     | Naphthalenes                    | Naphthoquinones                           | 0.752 | 0.898 | 0.646 | 419 |
| Polyketides                     | Macrolides                      | Zearalenones                              | 0.783 | 1.000 | 0.643 | 72  |
| Polyketides                     | Cyclic polyketides              | Oblogolides                               | 0.778 | 1.000 | 0.636 | 24  |
| Polyketides                     | Cyclic polyketides              | Furans                                    | 0.737 | 0.875 | 0.636 | 56  |
| Polyketides                     | Naphthalenes                    | Naphthalenes and derivatives              | 0.629 | 0.786 | 0.524 | 108 |
| Polyketides                     | Cyclic polyketides              | Simple cyclic polyketides                 | 0.632 | 0.857 | 0.500 | 61  |
| Polyketides                     | Miscellaneous polyketides       | Miscellaneous polyketides                 | 0.667 | 1.000 | 0.500 | 79  |
| Shikimates and Phenylpropanoids | Phenolic acids (C6-C1)          | Bagremycins                               | 1.000 | 1.000 | 1.000 | 7   |

|                                 |                          |                                              |       |       |       |     |
|---------------------------------|--------------------------|----------------------------------------------|-------|-------|-------|-----|
| Shikimates and Phenylpropanoids | Diphenyl ethers (DPEs)   | Marine-bacterial DPEs                        | 1.000 | 1.000 | 1.000 | 18  |
| Shikimates and Phenylpropanoids | Phenylpropanoids (C6-C3) | Cinnamoyl phenols                            | 1.000 | 1.000 | 1.000 | 18  |
| Shikimates and Phenylpropanoids | Mycosporine derivatives  | Mycosporine and Mycosporine-like amino acids | 1.000 | 1.000 | 1.000 | 27  |
| Shikimates and Phenylpropanoids | Lignans                  | Dibenzylbutyrolactone lignans                | 1.000 | 1.000 | 1.000 | 53  |
| Shikimates and Phenylpropanoids | Lignans                  | Furofuranoid lignans                         | 1.000 | 1.000 | 1.000 | 63  |
| Shikimates and Phenylpropanoids | Lignans                  | Dibenzocyclooctadienes lignans               | 1.000 | 1.000 | 1.000 | 127 |
| Shikimates and Phenylpropanoids | Lignans                  | Coumarinolignans                             | 0.933 | 0.875 | 1.000 | 28  |
| Shikimates and Phenylpropanoids | Coumarins                | Coumarinolignans                             | 0.933 | 0.875 | 1.000 | 28  |
| Shikimates and Phenylpropanoids | Diarylheptanoids         | Biaryl type diarylheptanoids                 | 1.000 | 1.000 | 1.000 | 56  |
| Shikimates and Phenylpropanoids | Fluorenes                | Selaginellins                                | 1.000 | 1.000 | 1.000 | 42  |
| Shikimates and Phenylpropanoids | Flavonoids               | Flavans                                      | 1.000 | 1.000 | 1.000 | 20  |
| Shikimates and Phenylpropanoids | Flavonoids               | Aurones                                      | 1.000 | 1.000 | 1.000 | 43  |
| Shikimates and Phenylpropanoids | Flavonoids               | Isoaurones                                   | 1.000 | 1.000 | 1.000 | 12  |
| Shikimates and Phenylpropanoids | Flavonoids               | Flavonostilbenes                             | 1.000 | 1.000 | 1.000 | 14  |
| Shikimates and Phenylpropanoids | Stilbenoids              | Flavonostilbenes                             | 1.000 | 1.000 | 1.000 | 14  |
| Shikimates and Phenylpropanoids | Stilbenoids              | Stilbenolignans                              | 1.000 | 1.000 | 1.000 | 15  |
| Shikimates and Phenylpropanoids | Lignans                  | Stilbenolignans                              | 1.000 | 1.000 | 1.000 | 15  |
| Shikimates and Phenylpropanoids | Isoflavonoids            | Coumaronochromones                           | 0.971 | 0.944 | 1.000 | 49  |

|                                 |                  |                                   |       |       |       |      |
|---------------------------------|------------------|-----------------------------------|-------|-------|-------|------|
| Shikimates and Phenylpropanoids | Flavonoids       | Open-chained neoflavonoids        | 1.000 | 1.000 | 1.000 | 9    |
| Shikimates and Phenylpropanoids | Phenanthrenoids  | Phenanthrenes                     | 0.988 | 0.977 | 1.000 | 421  |
| Shikimates and Phenylpropanoids | Flavonoids       | Flavonols                         | 0.993 | 0.995 | 0.991 | 1097 |
| Shikimates and Phenylpropanoids | Flavonoids       | Flavones                          | 0.987 | 0.987 | 0.987 | 1148 |
| Shikimates and Phenylpropanoids | Flavonoids       | Flavan-3-ols                      | 0.925 | 0.886 | 0.969 | 147  |
| Shikimates and Phenylpropanoids | Styrylpyrones    | Kavalactones and derivatives      | 0.926 | 0.893 | 0.962 | 129  |
| Shikimates and Phenylpropanoids | Flavonoids       | Chalcones                         | 0.969 | 0.978 | 0.960 | 1386 |
| Shikimates and Phenylpropanoids | Lignans          | Furanoid lignans                  | 0.950 | 0.950 | 0.950 | 40   |
| Shikimates and Phenylpropanoids | Diarylheptanoids | Diarylether type diarylheptanoids | 0.974 | 1.000 | 0.950 | 47   |
| Shikimates and Phenylpropanoids | Flavonoids       | Anthocyanidins                    | 0.972 | 1.000 | 0.946 | 597  |
| Shikimates and Phenylpropanoids | Flavonoids       | Dihydroflavonols                  | 0.889 | 0.842 | 0.941 | 84   |
| Shikimates and Phenylpropanoids | Xanthones        | Plant xanthones                   | 0.968 | 1.000 | 0.938 | 162  |
| Shikimates and Phenylpropanoids | Coumarins        | Furocoumarins                     | 0.955 | 0.981 | 0.930 | 263  |
| Shikimates and Phenylpropanoids | Diarylheptanoids | Linear diarylheptanoids           | 0.912 | 0.897 | 0.929 | 138  |
| Shikimates and Phenylpropanoids | Flavonoids       | Proanthocyanins                   | 0.963 | 1.000 | 0.929 | 71   |
| Shikimates and Phenylpropanoids | Flavonoids       | Flavanones                        | 0.944 | 0.962 | 0.927 | 516  |
| Shikimates and Phenylpropanoids | Stilbenoids      | Oligomeric stibenes               | 0.945 | 0.977 | 0.915 | 225  |
| Shikimates and Phenylpropanoids | Isoflavonoids    | Isoflavones                       | 0.944 | 0.977 | 0.913 | 233  |

|                                 |                                     |                                        |       |       |       |     |
|---------------------------------|-------------------------------------|----------------------------------------|-------|-------|-------|-----|
| Shikimates and Phenylpropanoids | Phenylpropanoids (C6-C3)            | Cinnamic acid amides                   | 0.952 | 1.000 | 0.909 | 24  |
| Shikimates and Phenylpropanoids | Isoflavonoids                       | Coumestan                              | 0.947 | 1.000 | 0.900 | 54  |
| Shikimates and Phenylpropanoids | Isoflavonoids                       | Rotenoids                              | 0.944 | 1.000 | 0.895 | 90  |
| Shikimates and Phenylpropanoids | Phenylpropanoids (C6-C3)            | Cinnamic acids and derivatives         | 0.926 | 0.962 | 0.893 | 142 |
| Shikimates and Phenylpropanoids | Terphenyls                          | m-Terphenyls                           | 0.842 | 0.800 | 0.889 | 11  |
| Shikimates and Phenylpropanoids | Phenolic acids (C6-C1)              | Gallotannins                           | 0.923 | 0.973 | 0.878 | 200 |
| Shikimates and Phenylpropanoids | Phenylethanoids (C6-C2)             | Phenylethanoids                        | 0.903 | 0.933 | 0.875 | 85  |
| Shikimates and Phenylpropanoids | Coumarins                           | Isocoumarins                           | 0.909 | 0.950 | 0.872 | 544 |
| Shikimates and Phenylpropanoids | Isoflavonoids                       | Pterocarpan                            | 0.915 | 0.964 | 0.871 | 159 |
| Shikimates and Phenylpropanoids | Flavonoids                          | Neoflavonoids                          | 0.897 | 0.929 | 0.867 | 75  |
| Shikimates and Phenylpropanoids | Terphenyls                          | p-Terphenyls                           | 0.923 | 1.000 | 0.857 | 138 |
| Shikimates and Phenylpropanoids | Diazotetronic acids and derivatives | Pulvinones                             | 0.923 | 1.000 | 0.857 | 75  |
| Shikimates and Phenylpropanoids | Coumarins                           | Pyranocoumarins                        | 0.896 | 0.956 | 0.843 | 200 |
| Shikimates and Phenylpropanoids | Small peptides                      | Aminoacids                             | 0.883 | 0.935 | 0.837 | 3   |
| Shikimates and Phenylpropanoids | Coumarins                           | Simple coumarins                       | 0.865 | 0.906 | 0.828 | 817 |
| Shikimates and Phenylpropanoids | Isoflavonoids                       | Isoflavanones                          | 0.848 | 0.875 | 0.824 | 86  |
| Shikimates and Phenylpropanoids | Isoflavonoids                       | 2-arylbenzofurans                      | 0.900 | 1.000 | 0.818 | 99  |
| Shikimates and Phenylpropanoids | Tropolones                          | Tropolones and derivatives (Shikimate) | 0.889 | 1.000 | 0.800 | 15  |

|                                 |                        |                                          |       |       |       |     |
|---------------------------------|------------------------|------------------------------------------|-------|-------|-------|-----|
| Shikimates and Phenylpropanoids | Lignans                | Neolignans                               | 0.870 | 0.952 | 0.800 | 230 |
| Shikimates and Phenylpropanoids | Lignans                | Arylnaphthalene and aryltetralin lignans | 0.884 | 1.000 | 0.792 | 118 |
| Shikimates and Phenylpropanoids | Stilbenoids            | Monomeric stilbenes                      | 0.857 | 0.955 | 0.778 | 114 |
| Shikimates and Phenylpropanoids | Flavonoids             | Flavonolignans                           | 0.857 | 1.000 | 0.750 | 64  |
| Shikimates and Phenylpropanoids | Lignans                | Flavonolignans                           | 0.857 | 1.000 | 0.750 | 64  |
| Shikimates and Phenylpropanoids | Flavonoids             | Flavandiols (Leucoanthocyanidins)        | 0.815 | 1.000 | 0.688 | 81  |
| Shikimates and Phenylpropanoids | Lignans                | Dibenzylbutane lignans                   | 0.750 | 1.000 | 0.600 | 54  |
| Shikimates and Phenylpropanoids | Phenolic acids (C6-C1) | Simple phenolic acids                    | 0.704 | 0.962 | 0.556 | 219 |
| Shikimates and Phenylpropanoids | Phenolic acids (C6-C1) | Shikimic acids and derivatives           | 0.444 | 0.571 | 0.364 | 62  |
| Shikimates and Phenylpropanoids | Lignans                | Minor lignans                            | 0.364 | 1.000 | 0.222 | 50  |
| Terpenoids                      | Diterpenoids           | Platensimycin and Platencins             | 1.000 | 1.000 | 1.000 | 35  |
| Terpenoids                      | Meroterpenoids         | Cannabinoids                             | 1.000 | 1.000 | 1.000 | 136 |
| Terpenoids                      | Phloroglucinols        | Phloroglucinol-terpene hybrids           | 1.000 | 1.000 | 1.000 | 35  |
| Terpenoids                      | Polyethers             | Oxasqualenoids                           | 1.000 | 1.000 | 1.000 | 26  |
| Terpenoids                      | Sesquiterpenoids       | Alliacane sesquiterpenoids               | 1.000 | 1.000 | 1.000 | 30  |
| Terpenoids                      | Sesquiterpenoids       | Allohimachalane sesquiterpenoids         | 1.000 | 1.000 | 1.000 | 10  |
| Terpenoids                      | Sesquiterpenoids       | Bicyclogermacrane sesquiterpenoids       | 1.000 | 1.000 | 1.000 | 36  |
| Terpenoids                      | Sesquiterpenoids       | Bicyclohumulane sesquiterpenoids         | 1.000 | 1.000 | 1.000 | 8   |
| Terpenoids                      | Sesquiterpenoids       | Chiloscyphane sesquiterpenoids           | 1.000 | 1.000 | 1.000 | 6   |
| Terpenoids                      | Sesquiterpenoids       | Coloratane sesquiterpenoids              | 1.000 | 1.000 | 1.000 | 15  |
| Terpenoids                      | Sesquiterpenoids       | Cyclobisabolane sesquiterpenoids         | 1.000 | 1.000 | 1.000 | 12  |
| Terpenoids                      | Sesquiterpenoids       | Cyclonerane sesquiterpenoids             | 1.000 | 1.000 | 1.000 | 10  |
| Terpenoids                      | Sesquiterpenoids       | Elemene sesquiterpenoids                 | 1.000 | 1.000 | 1.000 | 129 |

|            |                  |                                  |       |       |       |     |
|------------|------------------|----------------------------------|-------|-------|-------|-----|
| Terpenoids | Sesquiterpenoids | Fukinane sesquiterpenoids        | 1.000 | 1.000 | 1.000 | 49  |
| Terpenoids | Sesquiterpenoids | Herbertane sesquiterpenoids      | 0.952 | 0.909 | 1.000 | 19  |
| Terpenoids | Sesquiterpenoids | Iphionane sesquiterpenoids       | 1.000 | 1.000 | 1.000 | 15  |
| Terpenoids | Sesquiterpenoids | Isocomane sesquiterpenoids       | 1.000 | 1.000 | 1.000 | 15  |
| Terpenoids | Sesquiterpenoids | Ivaxillarane sesquiterpenoids    | 1.000 | 1.000 | 1.000 | 7   |
| Terpenoids | Sesquiterpenoids | Longipinane sesquiterpenoids     | 1.000 | 1.000 | 1.000 | 53  |
| Terpenoids | Sesquiterpenoids | Marasmane sesquiterpenoids       | 1.000 | 1.000 | 1.000 | 19  |
| Terpenoids | Sesquiterpenoids | Noreremophilane sesquiterpenoids | 0.933 | 0.875 | 1.000 | 20  |
| Terpenoids | Sesquiterpenoids | Oplopane sesquiterpenoids        | 1.000 | 1.000 | 1.000 | 52  |
| Terpenoids | Sesquiterpenoids | Pinguisane sesquiterpenoids      | 1.000 | 1.000 | 1.000 | 31  |
| Terpenoids | Sesquiterpenoids | Quadrane sesquiterpenoids        | 1.000 | 1.000 | 1.000 | 13  |
| Terpenoids | Sesquiterpenoids | Rotundane sesquiterpenoids       | 1.000 | 1.000 | 1.000 | 12  |
| Terpenoids | Sesquiterpenoids | Santalane sesquiterpenoids       | 1.000 | 1.000 | 1.000 | 41  |
| Terpenoids | Sesquiterpenoids | Sativane sesquiterpenoids        | 1.000 | 1.000 | 1.000 | 21  |
| Terpenoids | Sesquiterpenoids | Silphinane sesquiterpenoids      | 1.000 | 1.000 | 1.000 | 28  |
| Terpenoids | Sesquiterpenoids | Silphiperfolane sesquiterpenoids | 1.000 | 1.000 | 1.000 | 21  |
| Terpenoids | Sesquiterpenoids | Sinularane sesquiterpenoids      | 1.000 | 1.000 | 1.000 | 10  |
| Terpenoids | Sesquiterpenoids | Spiroaxane sesquiterpenoids      | 1.000 | 1.000 | 1.000 | 25  |
| Terpenoids | Sesquiterpenoids | Sterpurane sesquiterpenoids      | 1.000 | 1.000 | 1.000 | 15  |
| Terpenoids | Sesquiterpenoids | Artemisinin                      | 1.000 | 1.000 | 1.000 | 61  |
| Terpenoids | Sesquiterpenoids | Hamigerane sesquiterpenoids      | 1.000 | 1.000 | 1.000 | 11  |
| Terpenoids | Diterpenoids     | Prenylbisabolane diterpenoids    | 1.000 | 1.000 | 1.000 | 15  |
| Terpenoids | Diterpenoids     | Dactylomelane diterpenoids       | 1.000 | 1.000 | 1.000 | 14  |
| Terpenoids | Diterpenoids     | Cycloabietane diterpenoids       | 1.000 | 1.000 | 1.000 | 26  |
| Terpenoids | Diterpenoids     | Parguerane diterpenoids          | 1.000 | 1.000 | 1.000 | 20  |
| Terpenoids | Diterpenoids     | Devadarane diterpenoids          | 1.000 | 1.000 | 1.000 | 9   |
| Terpenoids | Diterpenoids     | Villanovane diterpenoids         | 1.000 | 1.000 | 1.000 | 13  |
| Terpenoids | Diterpenoids     | Aphidicolane diterpenoids        | 1.000 | 1.000 | 1.000 | 91  |
| Terpenoids | Diterpenoids     | Gibberellins                     | 1.000 | 1.000 | 1.000 | 140 |
| Terpenoids | Diterpenoids     | Norcembrane diterpenoids         | 1.000 | 1.000 | 1.000 | 10  |



|            |                  |                                   |       |       |       |     |
|------------|------------------|-----------------------------------|-------|-------|-------|-----|
| Terpenoids | Diterpenoids     | Gersemiane diterpenoids           | 1.000 | 1.000 | 1.000 | 5   |
| Terpenoids | Diterpenoids     | Asbestinane diterpenoids          | 1.000 | 1.000 | 1.000 | 21  |
| Terpenoids | Diterpenoids     | Sphaerane diterpenoids            | 1.000 | 1.000 | 1.000 | 24  |
| Terpenoids | Diterpenoids     | Dolastane diterpenoids            | 1.000 | 1.000 | 1.000 | 39  |
| Terpenoids | Diterpenoids     | Verrucosane diterpenoids          | 1.000 | 1.000 | 1.000 | 27  |
| Terpenoids | Diterpenoids     | Casbane diterpenoids              | 1.000 | 1.000 | 1.000 | 19  |
| Terpenoids | Diterpenoids     | Segetane diterpenoids             | 1.000 | 1.000 | 1.000 | 14  |
| Terpenoids | Diterpenoids     | Pepluane diterpenoids             | 1.000 | 1.000 | 1.000 | 10  |
| Terpenoids | Diterpenoids     | Paraliane diterpenoids            | 1.000 | 1.000 | 1.000 | 9   |
| Terpenoids | Diterpenoids     | Lathyrane diterpenoids            | 1.000 | 1.000 | 1.000 | 39  |
| Terpenoids | Diterpenoids     | Premyrsinane diterpenoids         | 1.000 | 1.000 | 1.000 | 12  |
| Terpenoids | Diterpenoids     | Myrsinane diterpenoids            | 0.909 | 0.833 | 1.000 | 51  |
| Terpenoids | Diterpenoids     | Tigliane diterpenoids             | 0.968 | 0.938 | 1.000 | 149 |
| Terpenoids | Diterpenoids     | Jatropholane diterpenoids         | 1.000 | 1.000 | 1.000 | 21  |
| Terpenoids | Diterpenoids     | Abeotaxane diterpenoids           | 1.000 | 1.000 | 1.000 | 22  |
| Terpenoids | Diterpenoids     | Trinervitane diterpenoids         | 1.000 | 1.000 | 1.000 | 39  |
| Terpenoids | Diterpenoids     | Kempene diterpenoids              | 1.000 | 1.000 | 1.000 | 3   |
| Terpenoids | Diterpenoids     | Amphilectane diterpenoids         | 1.000 | 1.000 | 1.000 | 38  |
| Terpenoids | Diterpenoids     | Eremane diterpenoids              | 1.000 | 1.000 | 1.000 | 4   |
| Terpenoids | Diterpenoids     | Lobane diterpenoids               | 0.968 | 0.938 | 1.000 | 37  |
| Terpenoids | Diterpenoids     | Decipiane diterpenoids            | 1.000 | 1.000 | 1.000 | 2   |
| Terpenoids | Diterpenoids     | Sacculatane diterpenoids          | 1.000 | 1.000 | 1.000 | 34  |
| Terpenoids | Diterpenoids     | Obtusane diterpenoids             | 1.000 | 1.000 | 1.000 | 4   |
| Terpenoids | Diterpenoids     | Breviane diterpenoids             | 1.000 | 1.000 | 1.000 | 13  |
| Terpenoids | Diterpenoids     | Cyclopiane diterpenoids           | 1.000 | 1.000 | 1.000 | 13  |
| Terpenoids | Sesterterpenoids | Asperane sesterterpenoids         | 1.000 | 1.000 | 1.000 | 7   |
| Terpenoids | Sesterterpenoids | Cericerane sesterterpenoids       | 1.000 | 1.000 | 1.000 | 14  |
| Terpenoids | Sesterterpenoids | Ophiobolane sesterterpenoids      | 1.000 | 1.000 | 1.000 | 30  |
| Terpenoids | Sesterterpenoids | Betaestacin-type sesterterpenoids | 1.000 | 1.000 | 1.000 | 6   |
| Terpenoids | Sesterterpenoids | Mangicol-type sesterterpenoids    | 1.000 | 1.000 | 1.000 | 9   |

|            |                   |                                             |       |       |       |    |
|------------|-------------------|---------------------------------------------|-------|-------|-------|----|
| Terpenoids | Triterpenoids     | Cycloapotirucallane triterpenoids           | 1.000 | 1.000 | 1.000 | 37 |
| Terpenoids | Triterpenoids     | Baccharane triterpenoids                    | 1.000 | 1.000 | 1.000 | 18 |
| Terpenoids | Triterpenoids     | Shionane triterpenoids                      | 1.000 | 1.000 | 1.000 | 21 |
| Terpenoids | Triterpenoids     | Pachysanane triterpenoids                   | 1.000 | 1.000 | 1.000 | 12 |
| Terpenoids | Triterpenoids     | Bauerane triterpenoids                      | 1.000 | 1.000 | 1.000 | 21 |
| Terpenoids | Triterpenoids     | Adianane triterpenoids                      | 1.000 | 1.000 | 1.000 | 12 |
| Terpenoids | Triterpenoids     | Filicane triterpenoids                      | 1.000 | 1.000 | 1.000 | 16 |
| Terpenoids | Triterpenoids     | Malabaricane triterpenoids                  | 1.000 | 1.000 | 1.000 | 44 |
| Terpenoids | Triterpenoids     | Saponaceolide triterpenoids                 | 1.000 | 1.000 | 1.000 | 20 |
| Terpenoids | Steroids          | Bufadienolides                              | 1.000 | 1.000 | 1.000 | 42 |
| Terpenoids | Carotenoids (C40) | Carotenoids (C40, $\beta$ - $\Psi$ )        | 1.000 | 1.000 | 1.000 | 97 |
| Terpenoids | Carotenoids (C40) | Carotenoids (C40, $\epsilon$ - $\Psi$ )     | 1.000 | 1.000 | 1.000 | 13 |
| Terpenoids | Carotenoids (C40) | Carotenoids (C40, $\pi$ - $\Psi$ )          | 1.000 | 1.000 | 1.000 | 8  |
| Terpenoids | Carotenoids (C40) | Carotenoids (C40, X- $\Psi$ )               | 0.667 | 0.500 | 1.000 | 3  |
| Terpenoids | Carotenoids (C40) | Carotenoids (C40, $\gamma$ - $\epsilon$ )   | 1.000 | 1.000 | 1.000 | 3  |
| Terpenoids | Carotenoids (C40) | Carotenoids (C40, $\beta$ - $\pi$ )         | 0.667 | 0.500 | 1.000 | 6  |
| Terpenoids | Carotenoids (C40) | Carotenoids (C40, $\beta$ -X)               | 1.000 | 1.000 | 1.000 | 8  |
| Terpenoids | Carotenoids (C40) | Carotenoids (C40, $\beta$ - $\kappa$ )      | 0.978 | 0.957 | 1.000 | 35 |
| Terpenoids | Carotenoids (C40) | Carotenoids (C40, $\kappa$ -X)              | 1.000 | 1.000 | 1.000 | 2  |
| Terpenoids | Carotenoids (C40) | Carotenoids (C40, $\pi$ - $\pi$ )           | 0.800 | 0.667 | 1.000 | 6  |
| Terpenoids | Carotenoids (C40) | Carotenoids (C40, $\pi$ -X)                 | 0.667 | 0.500 | 1.000 | 3  |
| Terpenoids | Carotenoids (C45) | Carotenoids (C45, $\beta$ - $\Psi$ )        | 1.000 | 1.000 | 1.000 | 2  |
| Terpenoids | Carotenoids (C45) | Carotenoids (C45, $\epsilon$ - $\Psi$ )     | 1.000 | 1.000 | 1.000 | 5  |
| Terpenoids | Carotenoids (C50) | Carotenoids (C50, $\beta$ - $\beta$ )       | 1.000 | 1.000 | 1.000 | 2  |
| Terpenoids | Carotenoids (C50) | Carotenoids (C50, $\epsilon$ - $\epsilon$ ) | 1.000 | 1.000 | 1.000 | 7  |
| Terpenoids | Carotenoids (C50) | Carotenoids (C50, $\gamma$ - $\gamma$ )     | 1.000 | 1.000 | 1.000 | 3  |
| Terpenoids | Apocarotenoids    | Apocarotenoids (C30, $\Psi$ - $\Psi$ )      | 0.842 | 0.727 | 1.000 | 33 |
| Terpenoids | Polyprenols       | Bactoprenols                                | 0.952 | 0.909 | 1.000 | 15 |
| Terpenoids | Polyprenols       | Dolichols                                   | 1.000 | 1.000 | 1.000 | 14 |
| Terpenoids | Polyprenols       | Polyprenol derivatives                      | 1.000 | 1.000 | 1.000 | 33 |

|            |                      |                                                        |       |       |       |     |
|------------|----------------------|--------------------------------------------------------|-------|-------|-------|-----|
| Terpenoids | Meroterpenoids       | Triketide meroterpenoids                               | 1.000 | 1.000 | 1.000 | 73  |
| Terpenoids | Meroterpenoids       | Other polyketide meroterpenoids                        | 1.000 | 1.000 | 1.000 | 24  |
| Terpenoids | Meroterpenoids       | Merosesquiterpenoids                                   | 1.000 | 1.000 | 1.000 | 34  |
| Terpenoids | Meroterpenoids       | Meroterpenoids with 5- or 6-membered ring              | 1.000 | 1.000 | 1.000 | 15  |
| Terpenoids | Meroterpenoids       | Meroterpenoids with bridged ring                       | 1.000 | 1.000 | 1.000 | 23  |
| Terpenoids | Diterpenoids         | Platensimycin and Platencins                           | 1.000 | 1.000 | 1.000 | 35  |
| Terpenoids | Meroterpenoids       | Merohemiterpenoids                                     | 0.933 | 0.875 | 1.000 | 14  |
| Terpenoids | Sesquiterpenoids     | Agarofuran sesquiterpenoids                            | 0.980 | 0.974 | 0.987 | 385 |
| Terpenoids | Meroterpenoids       | Polyprenylated cyclic polyketides (Hop meroterpenoids) | 0.992 | 1.000 | 0.984 | 303 |
| Terpenoids | Steroids             | Vitamin D3 and derivatives                             | 0.984 | 0.989 | 0.978 | 457 |
| Terpenoids | Triterpenoids        | Limonoids                                              | 0.983 | 0.989 | 0.977 | 438 |
| Terpenoids | Triterpenoids        | Lupane triterpenoids                                   | 0.978 | 0.985 | 0.971 | 689 |
| Terpenoids | Triterpenoids        | Ursane and Taraxastane triterpenoids                   | 0.984 | 1.000 | 0.969 | 162 |
| Terpenoids | Steroids             | Cardenolides                                           | 0.969 | 0.969 | 0.969 | 39  |
| Terpenoids | Diterpenoids         | Briarane diterpenoids                                  | 0.976 | 1.000 | 0.952 | 211 |
| Terpenoids | Diterpenoids         | Grayanotoxane diterpenoids                             | 0.974 | 1.000 | 0.950 | 100 |
| Terpenoids | Triterpenoids        | Oleanane triterpenoids                                 | 0.946 | 0.946 | 0.946 | 373 |
| Terpenoids | Sesquiterpenoids     | Lactarane sesquiterpenoids                             | 0.971 | 1.000 | 0.944 | 33  |
| Terpenoids | Tryptophan alkaloids | Indole-Diterpenoid alkaloids (Penitremes)              | 0.971 | 1.000 | 0.944 | 90  |
| Terpenoids | Meroterpenoids       | Prenyl quinone meroterpenoids                          | 0.949 | 0.959 | 0.940 | 251 |
| Terpenoids | Diterpenoids         | Mulinane diterpenoids                                  | 0.968 | 1.000 | 0.938 | 43  |
| Terpenoids | Sesterterpenoids     | Norsesterterpenoids                                    | 0.968 | 1.000 | 0.938 | 39  |
| Terpenoids | Carotenoids (C40)    | Carotenoids (C40, $\beta$ - $\beta$ )                  | 0.946 | 0.957 | 0.936 | 237 |
| Terpenoids | Sesquiterpenoids     | Laurane sesquiterpenoids                               | 0.903 | 0.875 | 0.933 | 68  |
| Terpenoids | Triterpenoids        | Dammarane and Protostane triterpenoids                 | 0.938 | 0.950 | 0.927 | 207 |
| Terpenoids | Sesquiterpenoids     | Cedrane and Isocedrane sesquiterpenoids                | 0.960 | 1.000 | 0.923 | 39  |
| Terpenoids | Sesterterpenoids     | Monocarbocyclic sesterterpenoids                       | 0.923 | 0.923 | 0.923 | 29  |
| Terpenoids | Carotenoids (C40)    | Carotenoids (C40, $\Psi$ - $\Psi$ )                    | 0.923 | 0.923 | 0.923 | 131 |
| Terpenoids | Diterpenoids         | Cembrane diterpenoids                                  | 0.953 | 0.989 | 0.919 | 493 |

|            |                  |                                                     |       |       |       |     |
|------------|------------------|-----------------------------------------------------|-------|-------|-------|-----|
| Terpenoids | Sesquiterpenoids | Aristolane sesquiterpenoids                         | 0.917 | 0.917 | 0.917 | 61  |
| Terpenoids | Sesquiterpenoids | Cyclofarnesane sesquiterpenoids                     | 0.957 | 1.000 | 0.917 | 25  |
| Terpenoids | Meroterpenoids   | Spriromeroterpenoids                                | 0.917 | 0.917 | 0.917 | 57  |
| Terpenoids | Sesquiterpenoids | Trichothecane sesquiterpenoids                      | 0.955 | 1.000 | 0.914 | 177 |
| Terpenoids | Pseudoalkaloids  | Steroidal alkaloids                                 | 0.948 | 0.986 | 0.913 | 405 |
| Terpenoids | Triterpenoids    | Quassinoids                                         | 0.954 | 1.000 | 0.912 | 169 |
| Terpenoids | Triterpenoids    | Cycloartane triterpenoids                           | 0.935 | 0.960 | 0.911 | 388 |
| Terpenoids | Triterpenoids    | Multiflorane triterpenoids                          | 0.952 | 1.000 | 0.909 | 54  |
| Terpenoids | Triterpenoids    | Serratane triterpenoids                             | 0.952 | 1.000 | 0.909 | 52  |
| Terpenoids | Diterpenoids     | Kaurane and Phyllocladane diterpenoids              | 0.940 | 0.975 | 0.907 | 228 |
| Terpenoids | Sesquiterpenoids | Chamigrane sesquiterpenoids                         | 0.950 | 1.000 | 0.905 | 107 |
| Terpenoids | Diterpenoids     | Nagilactone diterpenoids                            | 0.950 | 1.000 | 0.905 | 41  |
| Terpenoids | Sesquiterpenoids | Africanane sesquiterpenoids                         | 0.947 | 1.000 | 0.900 | 34  |
| Terpenoids | Sesquiterpenoids | Asteriscane sesquiterpenoids                        | 0.947 | 1.000 | 0.900 | 24  |
| Terpenoids | Diterpenoids     | Guanacastane diterpenoids                           | 0.947 | 1.000 | 0.900 | 52  |
| Terpenoids | Diterpenoids     | Pachydictyane diterpenoids                          | 0.900 | 0.900 | 0.900 | 52  |
| Terpenoids | Sesterterpenoids | Linear sesterterpenoids                             | 0.947 | 1.000 | 0.900 | 46  |
| Terpenoids | Steroids         | Ecdysteroids                                        | 0.947 | 1.000 | 0.900 | 99  |
| Terpenoids | Steroids         | Vitamin D2 and derivatives                          | 0.947 | 1.000 | 0.900 | 31  |
| Terpenoids | Triterpenoids    | Cucurbitane triterpenoids                           | 0.933 | 0.972 | 0.897 | 198 |
| Terpenoids | Diterpenoids     | Taxane diterpenoids                                 | 0.904 | 0.917 | 0.892 | 202 |
| Terpenoids | Sesquiterpenoids | Oppositane sesquiterpenoids                         | 0.941 | 1.000 | 0.889 | 25  |
| Terpenoids | Diterpenoids     | Furanoabietane diterpenoids                         | 0.842 | 0.800 | 0.889 | 19  |
| Terpenoids | Diterpenoids     | Tetracyclic diterpenoids                            | 0.867 | 0.847 | 0.889 | 390 |
| Terpenoids | Steroids         | Furostane steroids                                  | 0.923 | 0.973 | 0.878 | 204 |
| Terpenoids | Sesquiterpenoids | Germacrane sesquiterpenoids                         | 0.917 | 0.961 | 0.876 | 562 |
| Terpenoids | Sesquiterpenoids | Gymnomitrane sesquiterpenoids                       | 0.933 | 1.000 | 0.875 | 32  |
| Terpenoids | Sesquiterpenoids | Presilphiperfolane and Probotryane sesquiterpenoids | 0.933 | 1.000 | 0.875 | 18  |
| Terpenoids | Diterpenoids     | Pseudopterane diterpenoids                          | 0.933 | 1.000 | 0.875 | 46  |

|            |                   |                                          |       |       |       |     |
|------------|-------------------|------------------------------------------|-------|-------|-------|-----|
| Terpenoids | Diterpenoids      | Daphnane diterpenoids                    | 0.933 | 1.000 | 0.875 | 82  |
| Terpenoids | Diterpenoids      | Xenicane diterpenoids                    | 0.933 | 1.000 | 0.875 | 36  |
| Terpenoids | Diterpenoids      | Serrulatane and Biflorane diterpenoids   | 0.933 | 1.000 | 0.875 | 83  |
| Terpenoids | Triterpenoids     | Abeolupane triterpenoids                 | 0.933 | 1.000 | 0.875 | 14  |
| Terpenoids | Triterpenoids     | Acyclic triterpenoids                    | 0.897 | 0.929 | 0.867 | 37  |
| Terpenoids | Carotenoids (C40) | Carotenoids (C40, $\beta$ - $\epsilon$ ) | 0.897 | 0.929 | 0.867 | 74  |
| Terpenoids | Diterpenoids      | Dolabellane diterpenoids                 | 0.927 | 1.000 | 0.864 | 101 |
| Terpenoids | Triterpenoids     | Apotirucallane triterpenoids             | 0.905 | 0.950 | 0.864 | 109 |
| Terpenoids | Steroids          | Pregnane steroids                        | 0.918 | 0.982 | 0.862 | 311 |
| Terpenoids | Sesquiterpenoids  | Tremulane sesquiterpenoids               | 0.923 | 1.000 | 0.857 | 42  |
| Terpenoids | Sesquiterpenoids  | Pentalenane sesquiterpenoids             | 0.923 | 1.000 | 0.857 | 14  |
| Terpenoids | Diterpenoids      | Totarane diterpenoids                    | 0.923 | 1.000 | 0.857 | 46  |
| Terpenoids | Triterpenoids     | Onocerane triterpenoids                  | 0.923 | 1.000 | 0.857 | 19  |
| Terpenoids | Triterpenoids     | Polypodane triterpenoids                 | 0.923 | 1.000 | 0.857 | 14  |
| Terpenoids | Carotenoids (C50) | Carotenoids (C50, $\Psi$ - $\Psi$ )      | 0.923 | 1.000 | 0.857 | 14  |
| Terpenoids | Monoterpenoids    | Thujane monoterpenoids                   | 0.880 | 0.917 | 0.846 | 63  |
| Terpenoids | Diterpenoids      | Erythroxlane diterpenoids                | 0.917 | 1.000 | 0.846 | 29  |
| Terpenoids | Diterpenoids      | Xeniaphyllane diterpenoids               | 0.917 | 1.000 | 0.846 | 35  |
| Terpenoids | Pseudoalkaloids   | Terpenoid alkaloids                      | 0.902 | 0.965 | 0.846 | 335 |
| Terpenoids | Triterpenoids     | Hopane and Moretane triterpenoids        | 0.905 | 0.974 | 0.844 | 227 |
| Terpenoids | Monoterpenoids    | Iridoids monoterpenoids                  | 0.897 | 0.956 | 0.844 | 396 |
| Terpenoids | Steroids          | Androstane steroids                      | 0.897 | 0.963 | 0.839 | 164 |
| Terpenoids | Steroids          | Cholestane steroids                      | 0.833 | 0.829 | 0.836 | 550 |
| Terpenoids | Monoterpenoids    | Carane monoterpenoids                    | 0.893 | 0.962 | 0.833 | 152 |
| Terpenoids | Sesquiterpenoids  | Picrotoxane sesquiterpenoids             | 0.909 | 1.000 | 0.833 | 83  |
| Terpenoids | Sesquiterpenoids  | Thujopsane sesquiterpenoids              | 0.909 | 1.000 | 0.833 | 21  |
| Terpenoids | Sesquiterpenoids  | Valerenane sesquiterpenoids              | 0.909 | 1.000 | 0.833 | 18  |
| Terpenoids | Diterpenoids      | Halimane diterpenoids                    | 0.882 | 0.938 | 0.833 | 92  |
| Terpenoids | Diterpenoids      | Rhamnofolane diterpenoids                | 0.909 | 1.000 | 0.833 | 17  |
| Terpenoids | Steroids          | Cholane steroids                         | 0.909 | 1.000 | 0.833 | 59  |

|            |                  |                                      |       |       |       |     |
|------------|------------------|--------------------------------------|-------|-------|-------|-----|
| Terpenoids | Monoterpenoids   | Acyclic monoterpenoids               | 0.789 | 0.754 | 0.827 | 266 |
| Terpenoids | Sesquiterpenoids | Spirovetivane sesquiterpenoids       | 0.903 | 1.000 | 0.824 | 48  |
| Terpenoids | Apocarotenoids   | Apocarotenoids( $\epsilon$ -)        | 0.875 | 0.933 | 0.824 | 47  |
| Terpenoids | Diterpenoids     | Colensane and Clerodane diterpenoids | 0.868 | 0.920 | 0.821 | 150 |
| Terpenoids | Sesquiterpenoids | Himachalane sesquiterpenoids         | 0.900 | 1.000 | 0.818 | 37  |
| Terpenoids | Sesquiterpenoids | Nardosinane sesquiterpenoids         | 0.900 | 1.000 | 0.818 | 56  |
| Terpenoids | Diterpenoids     | Fusicoccane diterpenoids             | 0.900 | 1.000 | 0.818 | 57  |
| Terpenoids | Sesterterpenoids | Cheilanthane sesterterpenoids        | 0.857 | 0.900 | 0.818 | 26  |
| Terpenoids | Triterpenoids    | Fusidane triterpenoids               | 0.857 | 0.900 | 0.818 | 55  |
| Terpenoids | Sesquiterpenoids | Guaiane sesquiterpenoids             | 0.890 | 0.985 | 0.813 | 404 |
| Terpenoids | Sesquiterpenoids | Pseudoguaiane sesquiterpenoids       | 0.897 | 1.000 | 0.813 | 38  |
| Terpenoids | Diterpenoids     | Cassane diterpenoids                 | 0.867 | 0.929 | 0.813 | 166 |
| Terpenoids | Meroterpenoids   | Tetraketide meroterpenoids           | 0.882 | 0.968 | 0.811 | 184 |
| Terpenoids | Sesquiterpenoids | Eremophilane sesquiterpenoids        | 0.873 | 0.948 | 0.809 | 337 |
| Terpenoids | Diterpenoids     | Eunicellane diterpenoids             | 0.893 | 1.000 | 0.806 | 150 |
| Terpenoids | Sesterterpenoids | Scalarane sesterterpenoids           | 0.893 | 1.000 | 0.806 | 152 |
| Terpenoids | Sesquiterpenoids | Caryolane sesquiterpenoids           | 0.889 | 1.000 | 0.800 | 12  |
| Terpenoids | Sesquiterpenoids | Illudalane sesquiterpenoids          | 0.762 | 0.727 | 0.800 | 55  |
| Terpenoids | Diterpenoids     | Viscidane diterpenoids               | 0.889 | 1.000 | 0.800 | 10  |
| Terpenoids | Steroids         | Ergostane steroids                   | 0.831 | 0.873 | 0.793 | 596 |
| Terpenoids | Sesquiterpenoids | Patchoulane sesquiterpenoids         | 0.880 | 1.000 | 0.786 | 43  |
| Terpenoids | Diterpenoids     | Norkaurane diterpenoids              | 0.846 | 0.917 | 0.786 | 211 |
| Terpenoids | Diterpenoids     | Beyerane diterpenoids                | 0.880 | 1.000 | 0.786 | 69  |
| Terpenoids | Triterpenoids    | Fernane and Arborinane triterpenoids | 0.880 | 1.000 | 0.786 | 63  |
| Terpenoids | Diterpenoids     | Jatrophane diterpenoids              | 0.878 | 1.000 | 0.783 | 119 |
| Terpenoids | Sesquiterpenoids | Bergamotane sesquiterpenoids         | 0.875 | 1.000 | 0.778 | 26  |
| Terpenoids | Sesquiterpenoids | Illudane sesquiterpenoids            | 0.875 | 1.000 | 0.778 | 50  |
| Terpenoids | Triterpenoids    | Glutinane triterpenoids              | 0.875 | 1.000 | 0.778 | 27  |
| Terpenoids | Sesquiterpenoids | Aromadendrane sesquiterpenoids       | 0.850 | 0.944 | 0.773 | 109 |
| Terpenoids | Diterpenoids     | Ingenane diterpenoids                | 0.870 | 1.000 | 0.769 | 52  |

|            |                  |                                                  |       |       |       |     |
|------------|------------------|--------------------------------------------------|-------|-------|-------|-----|
| Terpenoids | Sesquiterpenoids | Bisabolane sesquiterpenoids                      | 0.848 | 0.955 | 0.764 | 281 |
| Terpenoids | Diterpenoids     | Labdane diterpenoids                             | 0.857 | 0.977 | 0.764 | 277 |
| Terpenoids | Diterpenoids     | Secolabdane diterpenoids                         | 0.865 | 1.000 | 0.762 | 46  |
| Terpenoids | Steroids         | Spirostane steroids                              | 0.842 | 0.941 | 0.762 | 107 |
| Terpenoids | Steroids         | Stigmastane steroids                             | 0.846 | 0.957 | 0.759 | 145 |
| Terpenoids | Monoterpenoids   | Menthane monoterpenoids                          | 0.829 | 0.920 | 0.754 | 308 |
| Terpenoids | Monoterpenoids   | Irregular monoterpenoids                         | 0.857 | 1.000 | 0.750 | 29  |
| Terpenoids | Sesquiterpenoids | Capnellane sesquiterpenoids                      | 0.857 | 1.000 | 0.750 | 29  |
| Terpenoids | Sesquiterpenoids | Carabrane sesquiterpenoids                       | 0.857 | 1.000 | 0.750 | 15  |
| Terpenoids | Sesquiterpenoids | Clovane sesquiterpenoids                         | 0.857 | 1.000 | 0.750 | 20  |
| Terpenoids | Diterpenoids     | Abietane diterpenoids                            | 0.800 | 0.857 | 0.750 | 162 |
| Terpenoids | Diterpenoids     | Spongiane diterpenoids                           | 0.833 | 0.938 | 0.750 | 103 |
| Terpenoids | Diterpenoids     | Trachylobane diterpenoids                        | 0.857 | 1.000 | 0.750 | 62  |
| Terpenoids | Diterpenoids     | Cyathane diterpenoids                            | 0.857 | 1.000 | 0.750 | 59  |
| Terpenoids | Diterpenoids     | Prenyleudesmane diterpenoids                     | 0.857 | 1.000 | 0.750 | 9   |
| Terpenoids | Triterpenoids    | Neohopane triterpenoids                          | 0.857 | 1.000 | 0.750 | 11  |
| Terpenoids | Monoterpenoids   | Monocyclic monoterpenoids                        | 0.844 | 0.974 | 0.745 | 253 |
| Terpenoids | Monoterpenoids   | Secoiridoid monoterpenoids                       | 0.853 | 1.000 | 0.744 | 194 |
| Terpenoids | Triterpenoids    | Lanostane, Tirucallane and Euphane triterpenoids | 0.820 | 0.934 | 0.731 | 387 |
| Terpenoids | Sesquiterpenoids | Brasilane sesquiterpenoids                       | 0.842 | 1.000 | 0.727 | 25  |
| Terpenoids | Monoterpenoids   | Pinane monoterpenoids                            | 0.814 | 0.923 | 0.727 | 167 |
| Terpenoids | Diterpenoids     | Verticillane diterpenoids                        | 0.842 | 1.000 | 0.727 | 53  |
| Terpenoids | Diterpenoids     | Atisane diterpenoids                             | 0.839 | 1.000 | 0.722 | 88  |
| Terpenoids | Sesquiterpenoids | Cuparane sesquiterpenoids                        | 0.833 | 1.000 | 0.714 | 70  |
| Terpenoids | Sesquiterpenoids | Eudesmane sesquiterpenoids                       | 0.800 | 0.909 | 0.714 | 343 |
| Terpenoids | Sesquiterpenoids | Zizaane sesquiterpenoids                         | 0.833 | 1.000 | 0.714 | 26  |
| Terpenoids | Diterpenoids     | Sphenolobane diterpenoids                        | 0.833 | 1.000 | 0.714 | 20  |
| Terpenoids | Meroterpenoids   | Meromonoterpenoids                               | 0.833 | 1.000 | 0.714 | 65  |
| Terpenoids | Sesquiterpenoids | Daucane sesquiterpenoids                         | 0.829 | 1.000 | 0.708 | 121 |
| Terpenoids | Diterpenoids     | Secokaurane diterpenoids                         | 0.828 | 1.000 | 0.706 | 86  |

|            |                  |                                       |       |       |       |     |
|------------|------------------|---------------------------------------|-------|-------|-------|-----|
| Terpenoids | Triterpenoids    | Taraxerane triterpenoids              | 0.828 | 1.000 | 0.706 | 85  |
| Terpenoids | Apocarotenoids   | Apocarotenoids ( $\beta$ -)           | 0.809 | 0.950 | 0.704 | 131 |
| Terpenoids | Sesquiterpenoids | Cycloeudesmane sesquiterpenoids       | 0.824 | 1.000 | 0.700 | 95  |
| Terpenoids | Steroids         | Estrane steroids                      | 0.824 | 1.000 | 0.700 | 52  |
| Terpenoids | Sesquiterpenoids | Botryane sesquiterpenoids             | 0.818 | 1.000 | 0.692 | 25  |
| Terpenoids | Sesquiterpenoids | Humulane sesquiterpenoids             | 0.815 | 1.000 | 0.688 | 83  |
| Terpenoids | Diterpenoids     | Podocarpene diterpenoids              | 0.774 | 0.889 | 0.686 | 174 |
| Terpenoids | Sesquiterpenoids | Campherene sesquiterpenoids           | 0.800 | 1.000 | 0.667 | 16  |
| Terpenoids | Sesquiterpenoids | Copacamphane sesquiterpenoids         | 0.800 | 1.000 | 0.667 | 6   |
| Terpenoids | Sesquiterpenoids | Dunniane sesquiterpenoids             | 0.800 | 1.000 | 0.667 | 8   |
| Terpenoids | Sesquiterpenoids | Gorgonane sesquiterpenoids            | 0.800 | 1.000 | 0.667 | 16  |
| Terpenoids | Sesquiterpenoids | Ishwarane sesquiterpenoids            | 0.800 | 1.000 | 0.667 | 10  |
| Terpenoids | Sesquiterpenoids | Isolactarane sesquiterpenoids         | 0.800 | 1.000 | 0.667 | 21  |
| Terpenoids | Diterpenoids     | Pimarane and Isopimarane diterpenoids | 0.784 | 0.952 | 0.667 | 148 |
| Terpenoids | Triterpenoids    | Friedelane triterpenoids              | 0.800 | 1.000 | 0.667 | 48  |
| Terpenoids | Triterpenoids    | Stictane triterpenoids                | 0.800 | 1.000 | 0.667 | 15  |
| Terpenoids | Sesquiterpenoids | Cadinane sesquiterpenoids             | 0.779 | 0.957 | 0.657 | 338 |
| Terpenoids | Sesquiterpenoids | Noreudesmane sesquiterpenoids         | 0.783 | 1.000 | 0.643 | 36  |
| Terpenoids | Diterpenoids     | Cleistanthane diterpenoids            | 0.778 | 1.000 | 0.636 | 58  |
| Terpenoids | Sesquiterpenoids | Copaane sesquiterpenoids              | 0.769 | 1.000 | 0.625 | 24  |
| Terpenoids | Sesquiterpenoids | Secoeudesmane sesquiterpenoids        | 0.769 | 1.000 | 0.625 | 21  |
| Terpenoids | Sesquiterpenoids | Acorane sesquiterpenoids              | 0.750 | 1.000 | 0.600 | 50  |
| Terpenoids | Sesquiterpenoids | Cubebane sesquiterpenoids             | 0.750 | 1.000 | 0.600 | 16  |
| Terpenoids | Sesquiterpenoids | Cyclolaurane sesquiterpenoids         | 0.750 | 1.000 | 0.600 | 14  |
| Terpenoids | Sesquiterpenoids | Humbertiane sesquiterpenoids          | 0.750 | 1.000 | 0.600 | 16  |
| Terpenoids | Sesquiterpenoids | Isodaucane sesquiterpenoids           | 0.750 | 1.000 | 0.600 | 17  |
| Terpenoids | Diterpenoids     | Iceanaxane diterpenoids               | 0.750 | 1.000 | 0.600 | 50  |
| Terpenoids | Triterpenoids    | Gammacerane triterpenoids             | 0.750 | 1.000 | 0.600 | 20  |
| Terpenoids | Apocarotenoids   | Megastigmanes                         | 0.714 | 0.882 | 0.600 | 122 |
| Terpenoids | Diterpenoids     | Phytane diterpenoids                  | 0.714 | 0.909 | 0.588 | 83  |



|            |                   |                                             |       |       |       |     |
|------------|-------------------|---------------------------------------------|-------|-------|-------|-----|
| Terpenoids | Meroterpenoids    | Miscellaneous meroterpenoids                | 0.720 | 0.947 | 0.581 | 157 |
| Terpenoids | Apocarotenoids    | Miscellaneous apocarotenoids                | 0.667 | 0.800 | 0.571 | 30  |
| Terpenoids | Diterpenoids      | Secoabietane diterpenoids                   | 0.710 | 1.000 | 0.550 | 96  |
| Terpenoids | Sesquiterpenoids  | Caryophyllane sesquiterpenoids              | 0.667 | 1.000 | 0.500 | 107 |
| Terpenoids | Sesquiterpenoids  | Homofarnesane sesquiterpenoids              | 0.667 | 1.000 | 0.500 | 7   |
| Terpenoids | Sesquiterpenoids  | Longibornane sesquiterpenoids               | 0.667 | 1.000 | 0.500 | 6   |
| Terpenoids | Sesquiterpenoids  | Pacifigorgiane sesquiterpenoids             | 0.667 | 1.000 | 0.500 | 9   |
| Terpenoids | Sesquiterpenoids  | Valerane sesquiterpenoids                   | 0.667 | 1.000 | 0.500 | 14  |
| Terpenoids | Diterpenoids      | Abeoabietane diterpenoids                   | 0.638 | 0.882 | 0.500 | 146 |
| Terpenoids | Diterpenoids      | Sphaeroane diterpenoids                     | 0.667 | 1.000 | 0.500 | 6   |
| Terpenoids | Carotenoids (C40) | Carotenoids (C40, $\beta$ - $\gamma$ )      | 0.667 | 1.000 | 0.500 | 4   |
| Terpenoids | Carotenoids (C40) | Carotenoids (C40, $\epsilon$ - $\epsilon$ ) | 0.667 | 1.000 | 0.500 | 7   |
| Terpenoids | Sesquiterpenoids  | Drimane sesquiterpenoids                    | 0.649 | 1.000 | 0.480 | 138 |
| Terpenoids | Monoterpenoids    | Camphane monoterpenoids                     | 0.621 | 0.900 | 0.474 | 101 |
| Terpenoids | Sesquiterpenoids  | Longifolane sesquiterpenoids                | 0.600 | 1.000 | 0.429 | 30  |
| Terpenoids | Sesquiterpenoids  | Farnesane sesquiterpenoids                  | 0.596 | 1.000 | 0.424 | 162 |
| Terpenoids | Monoterpenoids    | Fenchane monoterpenoids                     | 0.571 | 1.000 | 0.400 | 21  |
| Terpenoids | Sesquiterpenoids  | Prezizaane sesquiterpenoids                 | 0.571 | 1.000 | 0.400 | 52  |
| Terpenoids | Sesquiterpenoids  | Protoilludane sesquiterpenoids              | 0.545 | 0.857 | 0.400 | 75  |
| Terpenoids | Diterpenoids      | Valparane diterpenoids                      | 0.571 | 1.000 | 0.400 | 21  |
| Terpenoids | Diterpenoids      | Norpimarane and Norisopimarane diterpenoids | 0.522 | 0.857 | 0.375 | 76  |
| Terpenoids | Sesquiterpenoids  | Hirsutane sesquiterpenoids                  | 0.526 | 1.000 | 0.357 | 67  |
| Terpenoids | Diterpenoids      | Norlabdane diterpenoids                     | 0.516 | 1.000 | 0.348 | 84  |
| Terpenoids | Sesquiterpenoids  | Bourbonane sesquiterpenoids                 | 0.500 | 1.000 | 0.333 | 19  |
| Terpenoids | Sesquiterpenoids  | Thapsane sesquiterpenoids                   | 0.500 | 1.000 | 0.333 | 16  |
| Terpenoids | Diterpenoids      | Cyclophytane diterpenoids                   | 0.455 | 0.714 | 0.333 | 82  |
| Terpenoids | Sesquiterpenoids  | Secogermacrane sesquiterpenoids             | 0.400 | 1.000 | 0.250 | 15  |
| Terpenoids | Diterpenoids      | Cycloamphilectane diterpenoids              | 0.400 | 1.000 | 0.250 | 18  |

#### 4. References

1. Sawaya, A.; Abreu, I.; Andreazza, N.; Eberlin, M. N.; Mazzafera, P., Pilocarpine and related alkaloids in *Pilocarpus Vahl* (Rutaceae). *Alkaloids: Properties, applications and pharmacological effects* **2011**, 63-80.
2. Hook, I.; Mills, C.; Sheridan, H., Chapter 5 - Bioactive Naphthoquinones from Higher Plants. In *Studies in Natural Products Chemistry*, Atta ur, R., Ed. Elsevier: 2014; Vol. 41, pp 119-160.
3. Heretsch, P.; Giannis, A., Chapter Four - The Veratrum and Solanum Alkaloids. In *The Alkaloids: Chemistry and Biology*, Knölker, H.-J., Ed. Academic Press: 2015; Vol. 74, pp 201-232.
4. Belhassen, E.; Filippi, J. J.; Brevard, H.; Joulain, D.; Baldovini, N., Volatile constituents of vetiver: a review. *Flavour Frag J* **2015**, *30* (1), 26-82.
5. Cai, Y. S.; Guo, Y. W.; Krohn, K., Structure, bioactivities, biosynthetic relationships and chemical synthesis of the spirodioxynaphthalenes. *Nat Prod Rep* **2010**, *27* (12), 1840-1870.
6. Cerda-Garcia-Rojas, C. M.; Coronel, A. D.; de Lampasona, M. E. P.; Catalan, C. A. N.; Joseph-Nathan, P., Absolute configuration of lippifoliane and africanane derivatives. *Journal of natural products* **2005**, *68* (5), 659-665.
7. Chen, C. M.; Tao, H. M.; Chen, W. H.; Yang, B.; Zhou, X. F.; Luo, X. W.; Liu, Y. H., Recent advances in the chemistry and biology of azaphilones. *Rsc Adv* **2020**, *10* (17), 10197-10220.
8. Das, A.; Khosla, C., Biosynthesis of Aromatic Polyketides in Bacteria. *Accounts Chem Res* **2009**, *42* (5), 631-639.
9. Donnelly, D. M. X.; Boland, G. M., Isoflavonoids and Neoflavonoids - Naturally-Occurring O-Heterocycles. *Nat Prod Rep* **1995**, *12* (3), 321-338.
10. Ersmark, K.; Del Valle, J. R.; Hanessian, S., Chemistry and biology of the aeruginosin family of serine protease inhibitors. *Angew Chem Int Edit* **2008**, *47* (7), 1202-1223.
11. Espinosa-Bustos, C.; Cortes-Arriagada, D.; Soto-Arriaza, M. A.; Robinson-Duggon, J.; Pizarro, N.; Cabrera, A. R.; Fuentealba, D.; Salas, C. O., Fluorescence properties of aurone derivatives: an experimental and theoretical study with some preliminary biological applications. *Photoch Photobio Sci* **2017**, *16* (8), 1268-1276.
12. Fraga, B. M., Natural sesquiterpenoids. *Nat Prod Rep* **2006**, *23* (6), 943-972.
13. Frederich, M.; Hayette, M. P.; Tits, M.; De Mol, P.; Angenot, L., In vitro activities of Strychnos alkaloids and extracts against *Plasmodium falciparum*. *Antimicrob Agents Ch* **1999**, *43* (9), 2328-2331.
14. Geris, R.; Simpson, T. J., Meroterpenoids produced by fungi. *Nat Prod Rep* **2009**, *26* (8), 1063-1094.
15. Goodin, S.; Kane, M. P.; Rubin, E. H., Epothilones: Mechanism of action and biologic activity. *J*

*Clin Oncol* **2004**, *22* (10), 2015-2025.

16. Gordaliza, M., Terpenyl-Purines from the Sea. *Mar Drugs* **2009**, *7* (4), 833-849.
17. Hamed, R. B.; Gomez-Castellanos, J. R.; Henry, L.; Ducho, C.; McDonough, M. A.; Schofield, C. J., The enzymes of beta-lactam biosynthesis. *Nat Prod Rep* **2013**, *30* (1), 21-107.
18. Hanson, J. R., Diterpenoids. *Nat Prod Rep* **2000**, *17* (2), 165-174.
19. Harned, A. M.; Volp, K. A., The sorbicillinoid family of natural products: Isolation, biosynthesis, and synthetic studies. *Nat Prod Rep* **2011**, *28* (11), 1790-1810.
20. Holland, P. T.; Wilkins, A. L., Mass-Spectra of Some Naturally Occurring Stictane Triterpenoids and Their Trimethylsilyl Derivatives. *Org Mass Spectrom* **1979**, *14* (3), 160-166.
21. Hotti, H.; Rischer, H., The killer of Socrates: Coniine and Related Alkaloids in the Plant Kingdom. *Molecules* **2017**, *22* (11).
22. Huang, S. A.; Zhang, C. P.; Wang, K.; Li, G. Q.; Hu, F. L., Recent Advances in the Chemical Composition of Propolis. *Molecules* **2014**, *19* (12), 19610-19632.
23. Ishida, K.; Welker, M.; Christiansen, G.; Cadel-Six, S.; Bouchier, C.; Dittmann, E.; Hertweck, C.; de Marsac, N. T., Plasticity and Evolution of Aeruginosin Biosynthesis in Cyanobacteria. *Appl Environ Microb* **2009**, *75* (7), 2017-2026.
24. Jacobo-Herrera, N.; Perez-Plasencia, C.; Castro-Torres, V. A.; Martinez-Vazquez, M.; Gonzalez-Esquinca, A. R.; Zentella-Dehesa, A., Selective Acetogenins and Their Potential as Anticancer Agents. *Front Pharmacol* **2019**, *10*.
25. Ji, N. Y.; Wang, B. G., Nonhalogenated organic molecules from Laurencia algae. *Phytochem Rev* **2014**, *13* (3), 653-670.
26. Jiang, M. H.; Chen, S. H.; Li, J.; Liu, L., The Biological and Chemical Diversity of Tetramic Acid Compounds from Marine-Derived Microorganisms. *Mar Drugs* **2020**, *18* (2).
27. Jin, Z., Amaryllidaceae and Scelletium alkaloids. *Nat Prod Rep* **2016**, *33* (11), 1318-1343.
28. Kevin, D. A.; Meujo, D. A. F.; Hamann, M. T., Polyether ionophores: broad-spectrum and promising biologically active molecules for the control of drug-resistant bacteria and parasites. *Expert Opin Drug Dis* **2009**, *4* (2), 109-146.
29. Kharel, M. K.; Pahari, P.; Shepherd, M. D.; Tibrewal, N.; Nybo, S. E.; Shaaban, K. A.; Rohr, J., Angucyclines: Biosynthesis, mode-of-action, new natural products, and synthesis. *Nat Prod Rep* **2012**, *29* (2), 264-325.
30. Kumla, D.; Aung, T. S.; Buttachon, S.; Dethoup, T.; Gales, L.; Pereira, J. A.; Inacio, A.; Costa, P. M.; Lee, M.; Sekeroglu, N.; Silva, A. M. S.; Pinto, M. M. M.; Kijjoo, A., A New Dihydrochromone Dimer and Other Secondary Metabolites from Cultures of the Marine Sponge-Associated Fungi *Neosartorya fennelliae* KUFA 0811 and *Neosartorya tsunodae* KUFC 9213. *Mar Drugs* **2017**, *15* (12).

31. Kumla, D.; Dethoup, T.; Gales, L.; Pereira, J. A.; Freitas-Silva, J.; Costa, P. M.; Silva, A. M. S.; Pinto, M. M. M.; Kijjoa, A., Erubescensoic Acid, a New Polyketide and a Xanthonopyrone SPF-3059-26 from the Culture of the Marine Sponge-Associated Fungus *Penicillium erubescens* KUFA 0220 and Antibacterial Activity Evaluation of Some of Its Constituents. *Molecules* **2019**, *24* (1).
32. Kumla, D.; Pereira, J. A.; Dethoup, T.; Gales, L.; Freitas-Silva, J.; Costa, P. M.; Lee, M.; Silva, A. M. S.; Sekeroglu, N.; Pinto, M. M. M.; Kijjoa, A., Chromone Derivatives and Other Constituents from Cultures of the Marine Sponge-Associated Fungus *Penicillium erubescens* KUFA0220 and Their Antibacterial Activity. *Mar Drugs* **2018**, *16* (8).
33. Lan, W. J.; Fu, S. J.; Xu, M. Y.; Liang, W. L.; Lam, C. K.; Zhong, G. H.; Xu, J.; Yang, D. P.; Li, H. J., Five New Cytotoxic Metabolites from the Marine Fungus *Neosartorya pseudofischeri*. *Mar Drugs* **2016**, *14* (1).
34. Lee, K. Y.; Jeong, E. J.; Sung, S. H.; Kim, Y. C., Stemona alkaloids isolated from *Stemona tuberosa* roots and their inhibitory activity on lipopolysaccharide-induced nitric oxide production. *Rec Nat Prod* **2016**, *10* (1), 109-112.
35. Li, G. H.; Yang, Z. S.; Zhao, P. J.; Zheng, X.; Luo, S. L.; Sun, R.; Niu, X. M.; Zhang, K. Q., Three new acorane sesquiterpenes from *Trichoderma* sp YMF1.02647. *Phytochem Lett* **2011**, *4* (2), 86-88.
36. Liu, J. K., Natural terphenyls: Developments since 1877. *Chem Rev* **2006**, *106* (6), 2209-2223.
37. Lv, H. N.; She, G. M., Naturally Occurring Diarylheptanoids - A Supplementary Version. *Rec Nat Prod* **2012**, *6* (4), 321-333.
38. Ma, Y. M.; Liang, X. A.; Kong, Y.; Jia, B., Structural Diversity and Biological Activities of Indole Diketopiperazine Alkaloids from Fungi. *J Agr Food Chem* **2016**, *64* (35), 6659-6671.
39. Masters, K. S.; Brase, S., Xanthonones from Fungi, Lichens, and Bacteria: The Natural Products and Their Synthesis. *Chem Rev* **2012**, *112* (7), 3717-3776.
40. McGlacken, G. P.; Fairlamb, I. J. S., 2-Pyrone natural products and mimetics: isolation, characterisation and biological activity. *Nat Prod Rep* **2005**, *22* (3), 369-385.
41. Meng, J. J.; Wang, X. H.; Xu, D.; Fu, X. X.; Zhang, X. P.; Lai, D. W.; Zhou, L. G.; Zhang, G. Z., Sorbicillinoids from Fungi and Their Bioactivities. *Molecules* **2016**, *21* (6).
42. Rosemeyer, H., The chemodiversity of purine as a constituent of natural products. *Chem Biodivers* **2004**, *1* (3), 361-401.
43. Ruan, J. Y.; Zheng, C.; Liu, Y. X.; Qu, L.; Yu, H. Y.; Han, L. F.; Zhang, Y.; Wang, T., Chemical and Biological Research on Herbal Medicines Rich in Xanthonones. *Molecules* **2017**, *22* (10).
44. Singh, I. P.; Bharate, S. B., Phloroglucinol compounds of natural origin. *Nat Prod Rep* **2006**, *23* (4), 558-591.
45. Veitch, N. C., Isoflavonoids of the Leguminosae. *Nat Prod Rep* **2009**, *26* (6), 776-802.

46. Venkateswarlu, S.; Panchagnula, G. K.; Guraiah, M. B.; Subbaraju, G. V., Isoaurones: synthesis and stereochemical assignments of geometrical isomers. *Tetrahedron* **2006**, *62* (42), 9855-9860.
47. Welker, M.; von Dohren, H., Cyanobacterial peptides - Nature's own combinatorial biosynthesis. *FEMS microbiology reviews* **2006**, *30* (4), 530-563.
48. Williams, C. A.; Grayer, R. J., Anthocyanins and other flavonoids. *Nat Prod Rep* **2004**, *21* (4), 539-573.
49. Yamada, P.; Ono, T.; Shigemori, H.; Han, J.; Isoda, H., Inhibitory effect of tannins from galls of *Carpinus tschonoskii* on the degranulation of RBL-2H3 Cells. *Cytotechnology* **2012**, *64* (3), 349-356.
50. de Matos, P.; Dekker, A.; Ennis, M.; Hastings, J.; Haug, K.; Turner, S.; Steinbeck, C., ChEBI: a chemistry ontology and database. *J Cheminformatics* **2010**, *2* (Suppl 1), P6-P6.
51. Gu, J. Y.; Gui, Y. S.; Chen, L. R.; Yuan, G.; Lu, H. Z.; Xu, X. J., Use of Natural Products as Chemical Library for Drug Discovery and Network Pharmacology. *Plos One* **2013**, *8* (4).
52. Heller, S. R.; McNaught, A.; Pletnev, I.; Stein, S.; Tchekhovskoi, D., InChI, the IUPAC International Chemical Identifier. *J Cheminformatics* **2015**, *7*.
53. Rodrigues, T.; Reker, D.; Schneider, P.; Schneider, G., Counting on natural products for drug design. *Nat Chem* **2016**, *8* (6), 531-541.
54. Manning, C. D.; Raghavan, P.; Schütze, H., *Introduction to information retrieval*. Cambridge University Press: Cambridge, 2018.
55. Ioffe, S.; Szegedy, C. Batch Normalization: Accelerating Deep Network Training by Reducing Internal Covariate Shift *arXiv e-prints* [Online], 2015, p. arXiv:1502.03167. <https://ui.adsabs.harvard.edu/abs/2015arXiv150203167I> (accessed February 01, 2015).
56. Crow, W. D.; Hodgkin, J. H., Alkaloids of the Australian Rutaceae - Halfordia-Scleroxyla .1. The Structure of N-Methylhalfordinium Chloride. *Tetrahedron Letters* **1963**, (2), 85-89.
57. Crow, W. D.; Hodgkin, J. H.; Shannon, J. S., Alkaloids of the Australian Rutaceae: <I>Halfordia scleroxyla</I>. III. Mass spectrometry of halfordinol and related oxazoles. *Australian Journal of Chemistry* **1965**, *18* (9), 1433-1440.
58. Stephen, O.; Sain, M.; Maduh, U. J.; Jeong, D. U., An Efficient Deep Learning Approach to Pneumonia Classification in Healthcare. *J Healthc Eng* **2019**.
59. Hutter; Drougas, Automated Machine Learning. **2019**.
